# Quantitative dissection of transcription in development yields evidence for transcription factor-driven chromatin accessibility

Elizabeth Eck<sup>a,g</sup>, Jonathan Liu<sup>b,g</sup>, Maryam Kazemzadeh-Atoufi<sup>c</sup>, Sydney Ghoreishi<sup>d</sup>, Shelby Blythe<sup>e</sup>, Hernan G. Garcia<sup>a,b,d,f</sup>

<sup>a</sup>*Biophysics Graduate Group, University of California at Berkeley, Berkeley, California*

<sup>b</sup>*Department of Physics, University of California at Berkeley, Berkeley, California*

<sup>c</sup>*Department of Materials Science and Engineering, Northwestern University, Evanston, Illinois*

<sup>d</sup>*Department of Molecular and Cell Biology, University of California at Berkeley, Berkeley, California*

<sup>e</sup>*Department of Molecular Biosciences, Northwestern University, Evanston, Illinois*

<sup>f</sup>*Institute for Quantitative Biosciences-QB3, University of California at Berkeley, Berkeley, California*

<sup>g</sup>*These authors contributed equally*

---

## Abstract

Thermodynamic models of gene regulation can predict transcriptional regulation in bacteria, but in eukaryotes chromatin accessibility and energy expenditure may call for a different framework. Here we systematically tested the predictive power of models of DNA accessibility based on the Monod-Wyman-Changeux (MWC) model of allostery, which posits that chromatin fluctuates between accessible and inaccessible states. We dissected the regulatory dynamics of *hunchback* by the activator Bicoid and the pioneer-like transcription factor Zelda in living *Drosophila* embryos and showed that no thermodynamic or non-equilibrium MWC model can recapitulate *hunchback* transcription. Therefore, we explored a model where DNA accessibility is not the result of thermal fluctuations but is catalyzed by Bicoid and Zelda, possibly through histone acetylation, and found that this model can predict *hunchback* dynamics. Thus, our theory-experiment dialogue uncovered potential molecular mechanisms of transcriptional regulatory dynamics, a key step toward reaching a predictive understanding of developmental decision-making.

**Keywords:** *Drosophila melanogaster*; bicoid; zelda; hunchback; Live-imaging;

Chromatin; Thermodynamic models; Non-equilibrium models; Pioneer-factor;  
Transcription

---

## 1. Introduction

Over the last decade, hopeful analogies between genetic and electronic circuits have posed the challenge of predicting the output gene expression of a DNA regulatory sequence in much the same way that the output current of an electronic circuit can be predicted from its wiring diagram (Endy, 2005). This challenge has been met with a plethora of theoretical works, including thermodynamic models, which use equilibrium statistical mechanics to calculate the probability of finding transcription factors bound to DNA and to relate this probability to the output rate of mRNA production (Ackers et al., 1982; Buchler et al., 2003; Vilar and Leibler, 2003; Bolouri and Davidson, 2003; Bintu et al., 2005b,a; Sherman and Cohen, 2012). Thermodynamic models of bacterial transcription launched a dialogue between theory and experiments that has largely confirmed their predictive power for several operons (Ackers et al., 1982; Bakk et al., 2004; Zeng et al., 2010; He et al., 2010; Garcia and Phillips, 2011; Brewster et al., 2012; Cui et al., 2013; Brewster et al., 2014; Sepulveda et al., 2016; Razo-Mejia et al., 2018) with a few potential exceptions (Garcia et al., 2012; Hammar et al., 2014).

Following these successes, thermodynamic models have been widely applied to eukaryotes to describe transcriptional regulation in yeast (Segal et al., 2006; Gertz et al., 2009; Sharon et al., 2012; Zeigler and Cohen, 2014), human cells (Giorgetti et al., 2010), and the fruit fly *Drosophila melanogaster* (Jaeger et al., 2004a; Zinzen et al., 2006; Segal et al., 2008; Fakhouri et al., 2010; Parker et al., 2011; White et al., 2012; Samee et al., 2015; Sayal et al., 2016). However, two key differences between bacteria and eukaryotes cast doubt on the applicability of thermodynamic models to predict transcriptional regulation in the latter. First, in eukaryotes, DNA is tightly packed in nucleosomes and must become accessible in order for transcription factor binding and transcription to occur

(Polach and Widom, 1995; Levine, 2010; Schulze and Wallrath, 2007; Lam et al., 2008; Li et al., 2011; Fussner et al., 2011; Bai et al., 2011; Li et al., 2014a; Hansen and O’Shea, 2015). Second, recent reports have speculated that, unlike in bacteria, the equilibrium framework may be insufficient to account for the energy-expending steps involved in eukaryotic transcriptional regulation, such as histone modifications and nucleosome remodeling, calling for non-equilibrium models of transcriptional regulation (Kim and O’Shea, 2008; Estrada et al., 2016; Li et al., 2018; Park et al., 2019).

Recently, various theoretical models have incorporated chromatin accessibility and energy expenditure in theoretical descriptions of eukaryotic transcriptional regulation. First, models by Mirny (2010), Narula and Igoshin (2010), and Marzen et al. (2013) accounted for chromatin occluding transcription-factor binding by extending thermodynamic models to incorporate the Monod-Wyman-Changeux (MWC) model of allostery (Fig. 1A; Monod et al., 1965). This thermodynamic MWC model assumes that chromatin rapidly transitions between accessible and inaccessible states via thermal fluctuations, and that the binding of transcription factors to accessible DNA shifts this equilibrium toward the accessible state. Like all thermodynamic models, this model relies on the “occupancy hypothesis” (Hammar et al., 2014; Garcia et al., 2012; Phillips et al., 2019): the probability  $p_{bound}$  of finding RNA polymerase (RNAP) bound to the promoter, a quantity that can be easily computed, is linearly related to the rate of mRNA production  $\frac{dmRNA}{dt}$ , a quantity that can be experimentally measured, such that

$$\frac{dmRNA}{dt} = R p_{bound}. \quad (1)$$

Here,  $R$  is the rate of mRNA production when the system is in an RNAP-bound state (see Section S1.1 for a more detailed overview). Additionally, in all thermodynamic models, the transitions between states are assumed to be much faster than both the rate of transcriptional initiation and changes in transcription factor concentrations. This separation of time scales, combined with a lack of energy dissipation in the process of regulation, makes it possible to consider

the states to be in equilibrium such that the probability of each state can be computed using its Boltzmann weight (Garcia et al., 2007).

Despite the predictive power of thermodynamic models, eukaryotic tran-  
45 scription may not adhere to the requirements imposed by the thermodynamic  
framework. Indeed, Narula and Igoshin (2010), Hammar et al. (2014), Estrada  
et al. (2016), Scholes et al. (2017), and Li et al. (2018) have proposed the-  
oretical treatments of transcriptional regulation that maintain the occupancy  
hypothesis, but make no assumptions about separation of time scales or en-  
50 ergy expenditure in the process of regulation. When combined with the MWC  
mechanism of DNA allostery, these models result in a non-equilibrium MWC  
model (Fig. 1B). Here, no constraints are imposed on the relative values of the  
transition rates between states and energy can be dissipated over time. To our  
knowledge, neither the thermodynamic MWC model nor the non-equilibrium  
55 MWC model have been tested experimentally in eukaryotic transcriptional reg-  
ulation.

Here, we performed a systematic dissection of the predictive power of these  
MWC models of DNA allostery in the embryonic development of the fruit fly  
*Drosophila melanogaster* in the context of the step-like activation of the *hunch-*  
60 *back* gene by the Bicoid activator and the pioneer-like transcription factor Zelda  
(Driever et al., 1989; Nien et al., 2011; Xu et al., 2014). Specifically, we com-  
pared the predictions from these MWC models against dynamical measurements  
of input Bicoid and Zelda concentrations and output *hunchback* transcriptional  
activity. Using this approach, we discovered that no thermodynamic or non-  
65 equilibrium MWC model featuring the regulation of *hunchback* by Bicoid and  
Zelda could describe the transcriptional dynamics of this gene. We proposed a  
model in which Bicoid and Zelda, rather than passively biasing thermal fluctu-  
ations of chromatin toward the accessible state, actively assist the overcoming  
of an energetic barrier to make chromatin accessible through the recruitment  
70 of energy-consuming histone modifiers or chromatin remodelers. This model  
(Fig. 1C) recapitulated all of our experimental observations. This interplay  
between theory and experiment establishes a clear path to identify the molec-



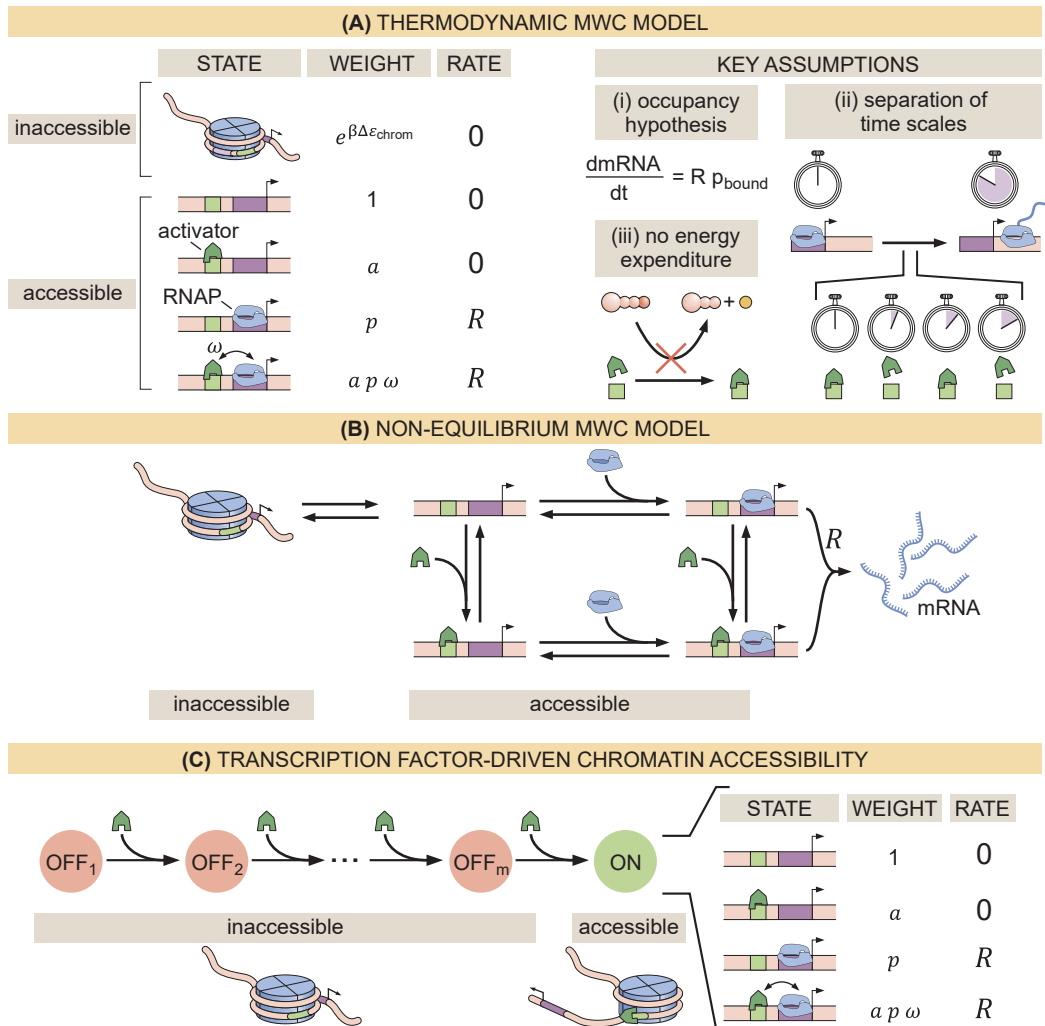

Figure 1: Three models of chromatin accessibility and transcriptional regulation. (A) Thermodynamic MWC model where chromatin can be inaccessible or accessible to transcription factor binding. Each state is associated with a statistical weight given by the Boltzmann distribution and with a rate of transcriptional initiation.  $\Delta\epsilon_{\text{chrom}}$  is the energy cost associated with making the DNA accessible and  $\omega$  is an interaction energy between the activator and RNAP.  $a = [\text{activator}]/K_a$  and  $p = [\text{RNAP}]/K_p$  with  $K_a$  and  $K_p$  being the dissociation constants of the activator and RNAP, respectively. This model assumes the occupancy hypothesis, separation of time scales, and lack of energy expenditure described in the text. (B) Non-equilibrium MWC model where no assumptions about separation of time scales or energy expenditure are made. Transition rates that depend on the concentration of the activator or RNAP are indicated by an arrow incorporating the respective protein. (C) Transcription factor-driven chromatin accessibility model where the activator catalyzes irreversible transitions of the DNA through  $m$  silent states before it becomes accessible. Once this accessible state is reached, the system is in equilibrium.

ular steps that make DNA accessible, to systematically test our model of transcription factor-driven chromatin accessibility, and to make progress toward a  
75 predictive understanding of transcriptional regulation in development.

## 2. Results

### 2.1. A thermodynamic MWC model of activation and chromatin accessibility by *Bicoid* and *Zelda*

During the first two hours of embryonic development, the *hunchback* P2  
80 minimal enhancer (Margolis et al., 1995; Driever et al., 1989; Perry et al., 2012; Park et al., 2019) is believed to be devoid of significant input signals other than activation by Bicoid and regulation of chromatin accessibility by both Bicoid and Zelda (Perry et al., 2012; Xu et al., 2014; Hannon et al., 2017). As a result, the early regulation of *hunchback* provides an ideal scaffold for a stringent test  
85 of simple theoretical models of eukaryotic transcriptional regulation.

Our implementation of the thermodynamic MWC model (Fig. 1A) in the context of *hunchback* states that in the inaccessible state, neither Bicoid nor Zelda can bind DNA. In the accessible state, DNA is unwrapped and the binding sites become accessible to these transcription factors. Due to the energetic cost  
90 of opening the chromatin ( $\Delta\varepsilon_{\text{chrom}}$ ), the accessible state is less likely to occur than the inaccessible one. However, the binding of Bicoid or Zelda can shift the equilibrium toward the accessible state (Adams and Workman, 1995; Miller and Widom, 2003; Mirny, 2010; Narula and Igoshin, 2010; Marzen et al., 2013).

In our model, we assume that all binding sites for a given molecular species  
95 have the same binding affinity. Relaxing this assumption does not affect any of our conclusions (as we will see below in Sections 2.3 and 2.4). Bicoid upregulates transcription by recruiting RNAP through a protein-protein interaction characterized by the parameter  $\omega_{bp}$ . We allow cooperative protein-protein interactions between Bicoid molecules, described by  $\omega_b$ . However, since to our  
100 knowledge there is no evidence of direct interaction between Zelda and any

other proteins, we assume no interaction between Zelda and Bicoid, or between Zelda and RNAP.

In Fig. 2A, we illustrate the simplified case of two Bicoid binding sites and one Zelda binding site, plus the corresponding statistical weights of each state given by their Boltzmann factors. Note that the actual model utilized throughout this work accounts for at least six Bicoid binding sites and ten Zelda binding sites that have been identified within the *hunchback* P2 enhancer (Section 4.1; Driever and Nusslein-Volhard, 1988b; Driever et al., 1989; Park et al., 2019). This general model is described in detail in Section S1.2.

The probability of finding RNAP bound to the promoter is calculated by dividing the sum of all statistical weights featuring RNAP by the sum of the weights corresponding to all possible system states. This leads to

$$p_{bound} = \frac{(1+z)^{n_z} p \left(1 + \sum_{i=1}^{n_b} \binom{n_b}{i} b^i \omega_b^{i-1} \omega_{bp}^i\right)}{\underbrace{e^{\Delta\varepsilon_{chrom}/k_B T}}_{\text{inaccessible state}} + \underbrace{(1+z)^{n_z}}_{\text{Zelda binding}} \underbrace{\left(1 + p + \sum_{j=0,1} \sum_{i=1}^{n_b} \binom{n_b}{i} b^i \omega_b^{i-1} p^j \omega_{bp}^{ij}\right)}_{\text{Bicoid and RNAP binding}}}, \quad (2)$$

where  $b = [Bicoid]/K_b$ ,  $z = [Zelda]/K_z$ , and  $p = [RNAP]/K_p$ , with  $[Bicoid]$ ,  $[Zelda]$ , and  $[RNAP]$  being the concentrations of Bicoid, Zelda, and RNAP, respectively, and  $K_b$ ,  $K_z$ , and  $K_p$  their dissociation constants (see Sections S1.1 and S1.2 for a detailed derivation). Given a set of model parameters, plugging  $p_{bound}$  into Equation 1 predicts the rate of RNAP loading as a function of Bicoid and Zelda concentrations as shown in Fig. 2B. Note that in this work, we treat the rate of transcriptional initiation and the rate of RNAP loading interchangeably.

## 2.2. Dynamical prediction and measurement of input-output functions in development

In order to experimentally test the theoretical model in Fig. 2, it is necessary to measure both the inputs – the concentrations of Bicoid and Zelda – as well as the output rate of RNAP loading. Typically, when testing models

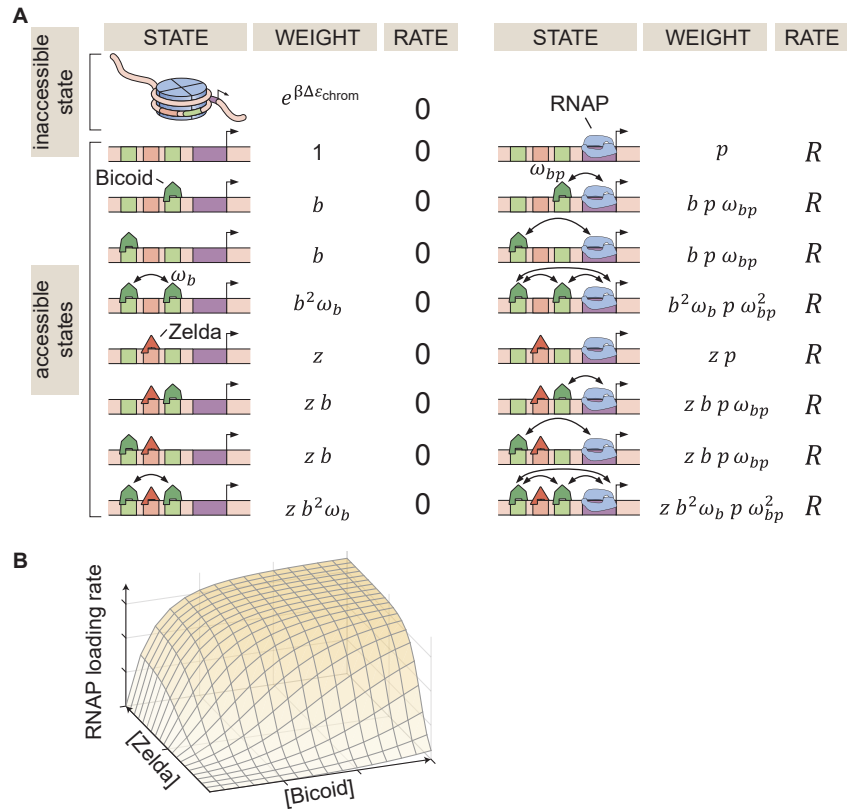

Figure 2: Thermodynamic MWC model of transcriptional regulation by Bicoid and Zelda. (A) States and statistical weights for a simplified version of the *hunchback* P2 enhancer. In this model, we assume that chromatin occluded by nucleosomes is not accessible to transcription factors or RNAP. Parameters are defined in the text. (B) 3D input-output function predicting the rate of RNAP loading (and of transcriptional initiation) as a function of Bicoid and Zelda concentrations for a given set of model parameters.

of transcriptional regulation in bacteria and eukaryotes, input transcription-factor concentrations are assumed to not be modulated in time: regulation is  
125 in steady state (Ackers et al., 1982; Bakk et al., 2004; Segal et al., 2008; Garcia and Phillips, 2011; Sherman and Cohen, 2012; Cui et al., 2013; Little et al., 2013; Raveh-Sadka et al., 2009; Sharon et al., 2012; Zeigler and Cohen, 2014; Xu et al., 2015; Sepulveda et al., 2016; Estrada et al., 2016; Razo-Mejia et al., 2018; Zoller et al., 2018; Park et al., 2019). However, embryonic development is  
130 a highly dynamic process in which the concentrations of transcription factors are constantly changing due to their nuclear import and export dynamics, and due to protein production, diffusion, and degradation (Edgar and Schubiger, 1986; Edgar et al., 1987; Jaeger et al., 2004b; Gregor et al., 2007b). As a result, it is necessary to go beyond steady-state assumptions and to predict and measure  
135 how the *instantaneous*, time-varying concentrations of Bicoid and Zelda at each point in space dictate *hunchback* output transcriptional dynamics.

In order to quantify the concentration dynamics of Bicoid, we utilized an established Bicoid-eGFP line (Sections 4.2, 4.4, and 4.5; Figs. 3A and S3A; Video S1; Gregor et al., 2007b; Liu et al., 2013). As expected, this line displayed  
140 the exponential Bicoid gradient across the length of the embryo (Section S2.1; Fig. S3B). We measured mean Bicoid nuclear concentration dynamics along the anterior-posterior axis of the embryo, as exemplified for two positions in Fig. 3A. As previously reported (Gregor et al., 2007b), after anaphase and nuclear envelope formation, the Bicoid nuclear concentration quickly increases  
145 as a result of nuclear import. These measurements were used as inputs into the theoretical model in Fig. 2.

Zelda concentration dynamics were measured in a Zelda-sfGFP line (Sections 4.2, 4.4, and 4.5; Video S2; Hamm et al., 2017). Consistent with previous results (Staudt et al., 2006; Liang et al., 2008), the Zelda concentration was spa-  
150 tially uniform along the embryo (Fig. S3). Contrasting Figs. 3A and B reveals that the overall concentration dynamics of both Bicoid and Zelda are qualitatively comparable. As a result of Zelda's spatial uniformity, we used mean Zelda nuclear concentration dynamics averaged across all nuclei within the field

of view to test our model (Section S2.1; Fig. 3B).

155 Given the high reproducibility of the concentration dynamics of Bicoid and  
Zelda (Fig. S3), we combined measurements from multiple embryos by synchro-  
nizing their anaphase in order to create an “averaged embryo” (Section S2.1), an  
approach that has been repeatedly used to describe protein and transcriptional  
dynamics in the early fly embryo (Garcia et al., 2013; Bothma et al., 2014, 2015;  
160 Berrocal et al., 2018; Lammers et al., 2019).

Our model assumes that *hunchback* output depends on the instantaneous  
concentration of input transcription factors. As a result, at each position along  
the anterior-posterior axis of the embryo, the combined Bicoid and Zelda concen-  
tration dynamics define a trajectory over time along the predicted input-output  
165 function surface (Fig. 3C). The resulting trajectory predicts the rate of RNAP  
loading as a function of time. However, instead of focusing on calculating RNAP  
loading rate, we used it to compute the number of RNAP molecules actively  
transcribing *hunchback* at each point in space and time, a more experimentally  
accessible quantity (Section 2.3). This quantity can be obtained by accounting  
170 for the RNAP elongation rate and the cleavage of nascent RNA upon termina-  
tion (Section S2.2; Fig. S4; Bothma et al., 2014; Lammers et al., 2019) yielding  
the predictions shown in Fig. 3D.

Instead of examining the full time-dependent nature of our data, we analyzed  
two main dynamical features stemming from our prediction of the number of  
175 RNAP molecules actively transcribing *hunchback*: the initial rate of RNAP  
loading and the transcriptional onset time,  $t_{on}$ , defined by the slope of the  
initial rise in the predicted number of RNAP molecules, and the time after  
anaphase at which transcription starts as determined by the x-intercept of the  
linear fit to the initial rise, respectively (Fig. 3D).

180 Examples of the predictions generated by our theoretical model are shown  
in Fig. 3E and F, where we calculate the initial rate of RNAP loading and  
 $t_{on}$  for different values of the Bicoid dissociation constant  $K_b$ . This framework  
for quantitatively investigating dynamic input-output functions in living em-  
bryos is a necessary step toward testing the predictions of theoretical models of

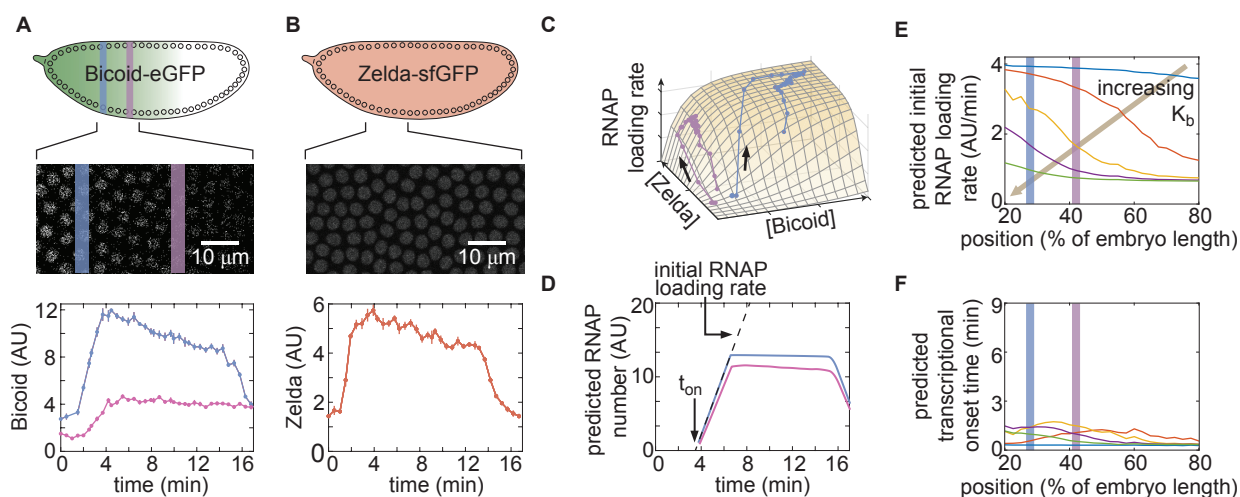

Figure 3: Prediction and measurement of dynamical input-output functions. (A) Measurement of Bicoid concentration dynamics in nuclear cycle 13. Color denotes different positions along the embryo and time is defined with respect to anaphase. (B) Zelda concentration dynamics. These dynamics are uniform throughout the embryo. (C) Trajectories defined by the input concentration dynamics of Bicoid and Zelda along the predicted input-output surface. Each trajectory corresponds to the RNAP loading-rate dynamics experienced by nuclei at the positions indicated in (A). (D) Predicted number of RNAP molecules actively transcribing the gene as a function of time and position along the embryo, and calculation of the corresponding initial rate of RNAP loading and the time of transcriptional onset,  $t_{on}$ . (E,F) Predicted *hunchback* (E) initial rate of RNAP loading and (F)  $t_{on}$  as a function of position along the embryo for varying values of the Bicoid dissociation constant  $K_b$ . (A, B, error bars are standard error of the mean nuclear fluorescence in an individual embryo, averaged across all nuclei at a given position; D, the standard error of the mean predicted RNAP number in a single embryo, propagated from the errors in A and B, is thinner than the curve itself; E, F, only mean predictions are shown so as to not obscure differences between them; we imaged  $n=6$  Bicoid-GFP and  $n=3$  Zelda-GFP embryos.)

185 transcriptional regulation in development.

### 2.3. *The thermodynamic MWC model fails to predict activation of hunchback in the absence of Zelda*

In order to test the predictions of the thermodynamic MWC model (Fig. 3E and F), we used the MS2 system (Bertrand et al., 1998; Garcia et al., 2013; Lucas et al., 2013). Here, 24 repeats of the MS2 loop are inserted in the 5' untranslated region of the *hunchback* P2 reporter (Garcia et al., 2013), resulting in the fluorescent labeling of sites of nascent transcript formation (Fig. 4A; Video S3). This fluorescence is proportional to the number of RNAP molecules actively transcribing the gene (Garcia et al., 2013). The experimental mean fluorescence as a function of time measured in a narrow window (2.5% of the total embryo length, averaged across nuclei in the window) along the length of the embryo (Fig. 4B) is in qualitative agreement with the theoretical prediction (Fig. 3D).

To compare theory and experiment, we next obtained the initial RNAP loading rates (Fig. 4C, points) and  $t_{on}$  (Fig. 4D, points) from the experimental data (Section S2.3; Fig. S5B). The step-like shape of the RNAP loading rate (Fig. 4C) agrees with previous measurements performed on this same reporter construct (Garcia et al., 2013). The plateaus at the extreme anterior and posterior positions were used to constrain the maximum and minimum theoretically allowed values in the model (Section S1.3). With these constraints in place, we attempted to simultaneously fit the thermodynamic MWC model to both the initial rate of RNAP loading and  $t_{on}$ . For a given set of model parameters, the measurements of Bicoid and Zelda concentration dynamics predicted a corresponding initial rate of RNAP loading and  $t_{on}$  (Fig. 3E and F). The model parameters were then iterated using standard curve-fitting techniques (Section 4.6) until the best fit to the experimental data was achieved (Fig. 4C and D, lines).

Although the model accounted for the initial rate of RNAP loading (Fig. 4C, line), it produced transcriptional onset times that were much lower than those that we experimentally observed (Fig. S6B, purple line). We hypothesized that



this disagreement was due to our model not accounting for mitotic repression, when the transcriptional machinery appears to be silent immediately after cell division (Shermoen and O’Farrell, 1991; Gottesfeld and Forbes, 1997; Parsons and Tg, 1997; Garcia et al., 2013). Thus, we modified the thermodynamic MWC model to include a mitotic repression window term, implemented as a time window at the start of the nuclear cycle during which no transcription could occur; the rate of mRNA production is thus given by

$$\frac{dmRNA}{dt} = \begin{cases} 0 & \text{if } t < t_{MitRep} \\ Rp_{bound} & \text{if } t \geq t_{MitRep} \end{cases}, \quad (3)$$

where  $R$  and  $p_{bound}$  are as defined in Eqns. 1 and 2, respectively, and  $t_{MitRep}$  is the mitotic repression time window over which no transcription can take place after anaphase (Sections S1.2 and S3.1). After incorporating mitotic repression, 215 the thermodynamic MWC model successfully fit both the rates of RNAP loading and  $t_{on}$  (Fig. 4C and D, lines, Fig. S6A and B).

Given this success, we next challenged the model to perform the simpler task of explaining Bicoid-mediated regulation in the absence of Zelda. This scenario corresponds to setting the concentration of Zelda to zero in the models 220 in Section S1.2 and Fig. 2. In order to test this seemingly simpler model, we repeated our measurements in embryos devoid of Zelda protein (Video S4). These  $zelda^-$  embryos were created by inducing clones of non-functional  $zelda$  mutant ( $zelda^{294}$ ) germ cells in female adults (Sections 4.2, 4.3; Liang et al., 2008). All embryos from these mothers lack maternally deposited Zelda; female embryos 225 still have a functional copy of  $zelda$  from their father, but this copy is not transcribed until after the maternal-to-zygotic transition, during nuclear cycle 14 (Liang et al., 2008). We confirmed that the absence of Zelda did not have a substantial effect on the spatiotemporal pattern of Bicoid (Section S4.1; Xu et al., 2014).

230 While close to 100% of nuclei in wild-type embryos exhibited transcription along the length of the embryo (Fig. 4E; Video S5), measurements in the  $zelda^-$  background revealed that some nuclei never displayed any transcription during

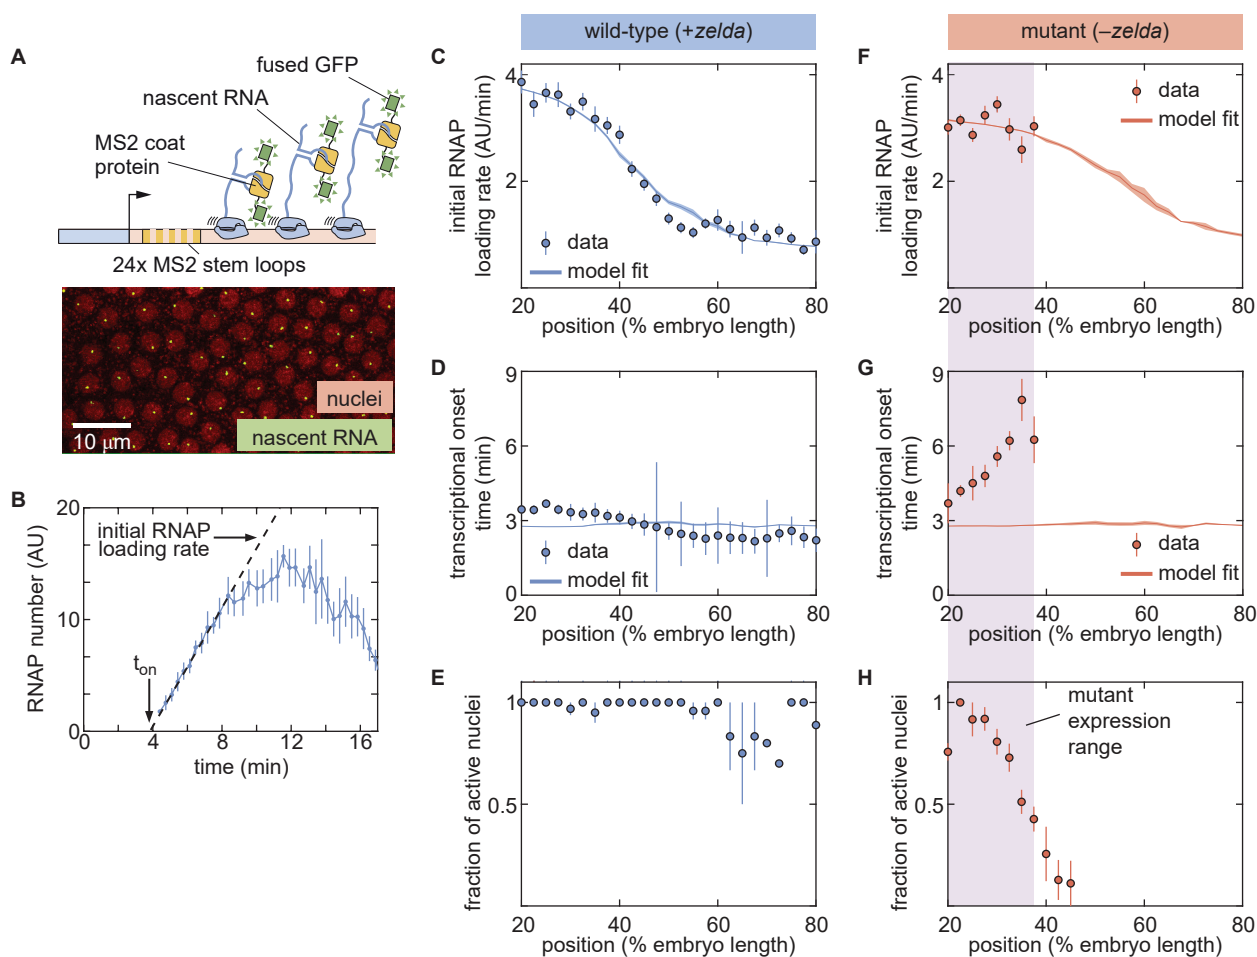

Figure 4: The thermodynamic MWC model can explain *hunchback* transcriptional dynamics in wild-type, but not *zelda*<sup>-</sup>, embryos. (A) The MS2 system measures the number of RNAP molecules actively transcribing the *hunchback* reporter gene in live embryos. (B) Representative MS2 trace featuring the quantification of the initial rate of RNAP loading and  $t_{on}$ . (C) Initial RNAP loading rate and (D)  $t_{on}$  for wild-type embryos (points), compared with best fit to the thermodynamic MWC model (lines). (E) Fraction of transcriptionally active nuclei for wild-type embryos. Active nuclei are defined as nuclei that exhibited an MS2 spot at any time during the nuclear cycle. (F) Initial RNAP loading rate and (G)  $t_{on}$  for *zelda*<sup>-</sup> embryos (points), compared with best fit to the thermodynamic MWC model (lines). (H) Fraction of transcriptionally active nuclei for *zelda*<sup>-</sup> embryos. Purple shading indicates the spatial range over which at least 50% of nuclei display transcription. (B, error bars are standard error of the mean observed RNAP number, averaged across nuclei in a single embryo; C,D,F,G, solid lines indicate mean predictions of the model, shading represents standard error of the mean; C,D,E, error bars in data points represent standard error of the mean over 8 embryos; F,G,H, error bars in data points represent standard error of the mean over 14 embryos.)

the entire nuclear cycle (Video S6). Specifically, transcription occurred only in the anterior part of the embryo, with transcription disappearing completely in positions posterior to about 40% of the embryo length (Fig. 4H). From those  
235 positions in the mutant embryos that did exhibit transcription in at least 50% of observed nuclei, we extracted the initial rate of RNAP loading and  $t_{on}$  as a function of position. Interestingly, these RNAP loading rates were comparable to the corresponding rates in wild-type embryos (Fig. 4F, points). However, un-  
240 like in the wild-type case (Fig. 4D, points),  $t_{on}$  was not constant in the *zelda*<sup>-</sup> background. Instead,  $t_{on}$  became increasingly delayed in more posterior positions until transcription ceased posterior to 40% of the embryo length (Fig. 4G, points). Together, these observations indicated that removing Zelda primarily results in a delay of transcription with only negligible effects on the underly-  
245 ing rates of RNAP loading, consistent with previous fixed-embryo experiments (Nien et al., 2011; Foo et al., 2014) and with recent live-imaging measurements in which Zelda binding was reduced at specific enhancers (Dufourt et al., 2018; Yamada et al., 2019). We speculate that the loss of transcriptionally active nuclei posterior to 40% of the embryo length is a direct result of this delay in  
250  $t_{on}$ : by the time that onset would occur in those nuclei, the processes leading to the next mitosis have already started and repressed transcriptional activity.

Next, we attempted to simultaneously fit the model to the initial rates of RNAP loading and  $t_{on}$  in the *zelda*<sup>-</sup> mutant background. Although the model recapitulated the observed initial RNAP loading rates, we noticed a discrepancy  
255 between the observed and fitted transcriptional onset times of up to ~5 min (Fig. 4F and G). While the mutant data exhibited a substantial delay in more posterior nuclei, the model did not produce significant delays (Fig. 4G, line). Further, our model could not account for the lack of transcriptional activity posterior to 40% of the embryo length in the *zelda*<sup>-</sup> mutant (Fig. 4H).

260 These discrepancies suggest that the thermodynamic MWC model cannot fully describe the transcriptional regulation of the *hunchback* promoter by Bicoid and Zelda. However, the attempted fits in Fig. 4F and G correspond to a particular set of model parameters and therefore do not completely rule out the

possibility that there exists some parameter set of the thermodynamic MWC  
265 model capable of recapitulating the *zelda*<sup>-</sup> data.

In order to determine whether this model is *at all* capable of accounting for the *zelda*<sup>-</sup> transcriptional behavior, we systematically explored how its parameters dictate its predictions. To characterize and visualize the limits of our model, we examined a mathematically convenient metric: the average transcriptional onset delay along the anterior-posterior axis (Fig. 5A). This quantity is defined as the area under the curve of  $t_{on}$  versus embryo position, from 20% to 37.5% along the embryo (the positions where the *zelda*<sup>-</sup> data display transcription), divided by the corresponding distance along the embryo

$$\langle \text{onset delay} \rangle = \frac{1}{37.5\% - 20\%} \int_{20\%}^{37.5\%} (t_{on}(x) - t_{on}(x = 20\%)) dx, \quad (4)$$

where  $x$  is the position along the embryo and the value of  $t_{on}$  at 20% along the embryo was chosen as the offset with respect to which to define the zero of this integral (Section S5.1). The average  $t_{on}$  delay corresponding to the wild-type data is close to zero, and is substantially different from the larger value  
270 obtained from measurements in the *zelda*<sup>-</sup> background within experimental error (Fig. 5C, points).

Based on Estrada et al. (2016) and as detailed in Section S5.1, we used an algorithm to efficiently sample the parameter space of the thermodynamic MWC model (dissociation constants  $K_b$  and  $K_z$ , protein-protein interaction terms  $\omega_b$   
275 and  $\omega_{bp}$ , energy to make the DNA accessible  $\Delta\varepsilon_{\text{chrom}}$ , and length of the mitotic repression window  $t_{MitRep}$ ), and to calculate the corresponding average  $t_{on}$  delay for each parameter set. Fig. 5B features three specific realizations of this parameter search; for each combination of parameters considered, the predicted  $t_{on}$  is calculated and the corresponding average  $t_{on}$  delay computed. Although  
280 the wild-type data were contained within the thermodynamic MWC model region, the range of the average  $t_{on}$  delay predicted by the model (Fig. 5C, green rectangle) did not overlap with the *zelda*<sup>-</sup> data. We concluded that our thermodynamic MWC model is not sufficient to explain the regulation of *hunchback* by Bicoid and Zelda.

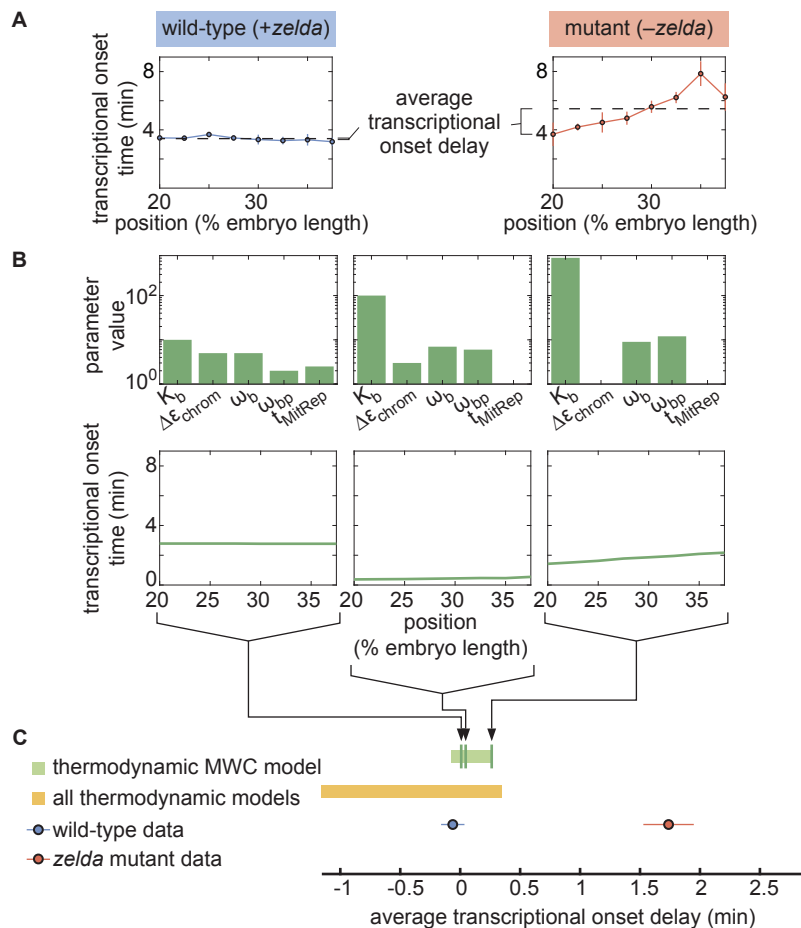

Figure 5: Failure of thermodynamic models to describe Bicoid-dependent activation of *hunchback*. (A) Experimentally determined  $t_{on}$ . Horizontal dashed lines indicate the average  $t_{on}$  delay with respect to  $t_{on}(x = 20\%)$  for wild-type and *zelda*<sup>-</sup> data sets. (B) Exploration of average  $t_{on}$  delay from the thermodynamic MWC model. Each choice of model parameters predicts a distinct  $t_{on}$  profile of along the embryo. (C) Predicted range of average  $t_{on}$  delay for all possible parameter choices of the thermodynamic MWC model (green), as well as for all thermodynamic models considering 12 Bicoid binding sites (yellow), compared with experimental data (red, blue). (A,C, error bars represent standard error of the mean over 8 and 14 embryos for the wild-type and *zelda*<sup>-</sup> datasets, respectively; B, solid lines indicate mean predictions of the model)

285 *2.4. No thermodynamic model can recapitulate the activation of hunchback by Bicoid alone*

Since the failure of the thermodynamic MWC model to predict the *zelda*<sup>-</sup> data does not necessarily rule out the existence of another thermodynamic model that can account for our experimental measurements, we considered other possible thermodynamic models. Conveniently, an arbitrary thermodynamic model featuring  $n_b$  Bicoid binding sites can be generalized using the mathematical expression

$$\frac{dm\text{RNA}}{dt} = \frac{\left(\sum_{i=0}^{n_b} P_{1,i} R [\text{Bicoid}]^i\right)}{p_{inacc} + \sum_{r=0}^1 \sum_{i=0}^{n_b} P_{r,i} [\text{Bicoid}]^i}, \quad (5)$$

where  $p_{inacc}$  and  $P_{r,i}$  are *arbitrary* weights describing the states in our generalized thermodynamic model,  $R$  is a rate constant that relates promoter occupancy to transcription rate, and the  $r$  and  $i$  summations refer to the numbers of  
290 RNAP and Bicoid molecules bound to the enhancer, respectively (Section S6.1; Bintu et al., 2005a; Estrada et al., 2016; Scholes et al., 2017).

Although this generalized thermodynamic model contains many more parameters than the thermodynamic MWC model previously considered, we could still systematically explore these parameters and the resulting average  $t_{on}$  delays. For added generality, and to account for recent reports suggesting the presence of more than six Bicoid binding sites in the *hunchback* minimal enhancer (Park et al., 2019), we expanded this model to include up to 12 Bicoid binding sites. Even though the generalized thermodynamic model occupied a larger region of the average  $t_{on}$  delay space than the thermodynamic MWC  
300 model, it still failed to explain the *zelda*<sup>-</sup> data (Section S6.2; Fig. 5C, yellow rectangle). Thus, our results strongly suggest that no thermodynamic model of Bicoid-activated *hunchback* transcription can predict transcriptional onset in the absence of Zelda, casting doubt on the general applicability of these models to transcriptional regulation in development.

305 Qualitatively, the reason for the failure of thermodynamic models to predict *hunchback* transcriptional is revealed by comparing Bicoid and Zelda concentration dynamics to those of the MS2 output signal (Fig. S10). The thermodynamic

models investigated in this work have assumed that the system responds *instantaneously* to any changes in input transcription factor concentration. As a result, since Bicoid and Zelda are imported into the nucleus by around 3 min into the nuclear cycle (Fig. 3A and B), these models always predict that transcription will ensue at approximately that time. Thus, thermodynamic models cannot accommodate delays in the  $t_{on}$  such as those revealed by the  $zelda^-$  data (see Section S6.3 for a more detailed explanation). Rather than further complicating our thermodynamic models with additional molecular players to attempt to describe the data, we instead decided to examine the broader purview of non-equilibrium models to attempt to reach an agreement between theory and experiment.

### 2.5. A non-equilibrium MWC model also fails to describe the $zelda^-$ data

Thermodynamic models based on equilibrium statistical mechanics can be seen as limiting cases of more general kinetic models that lie out of equilibrium (Section S6.4; Fig. 1B). Following recent reports (Estrada et al., 2016; Li et al., 2018; Park et al., 2019) that the theoretical description of transcriptional regulation in eukaryotes may call for models rooted in non-equilibrium processes – where the assumptions of separation of time scales and no energy expenditure may break down – we extended our earlier models to produce a non-equilibrium MWC model (Sections S6.4 and S7.1; Kim and O’Shea, 2008; Narula and Igoshin, 2010). This model, shown for the case of two Bicoid binding sites in Fig. 6A, accounts for the dynamics of the MWC mechanism by positing transition rates between the inaccessible and accessible chromatin states, but makes no assumptions about the relative magnitudes of these rates, or about the rates of Bicoid and RNAP binding and unbinding.

Since this model can operate out of steady state, we calculate the probabilities of each state as a function of time by solving the system of coupled ordinary differential equations (ODEs) associated with the system shown in Fig. 6A. Consistent with prior measurements (Blythe and Wieschaus, 2016), we assume that chromatin is inaccessible at the start of the nuclear cycle. Over

time, the system evolves such that the probability of it occupying each state becomes nonzero, making it possible to calculate the fraction of time RNAP  
340 is bound to the promoter and, through the occupancy hypothesis, the rate of RNAP loading.

We systematically varied the magnitudes of the transition rates and solved the system of ODEs in order to calculate the corresponding average  $t_{on}$  delay. Due to the combinatorial increase of free parameters as more Bicoid binding  
345 sites are included in the model, we could only explore the parameter space for models containing up to five Bicoid binding sites (Section S7.2; Figs. 6B and S9). Interestingly, while the upper bound of the average  $t_{on}$  delay monotonically increased with Bicoid binding site number, the lower bound of this delay did not vary in a systematic fashion (Fig. 6B). This phenomenon where the parameter  
350 space of a model does not strictly increase with binding site number has been previously observed (Estrada et al., 2016) and the reason for this effect remains uncertain. Regardless, none of the non-equilibrium MWC models with up to five Bicoid binding sites came close to reaching the mutant average  $t_{on}$  delay (Fig. 6B). We conjecture that the observed behavior extends to the biologically  
355 relevant case of six or more binding sites. Thus, we conclude that the more comprehensive non-equilibrium MWC model still cannot account for the experimental data, motivating an additional reexamination of our assumptions.

## 2.6. *Transcription factor-driven chromatin accessibility can capture all aspects of the data*

360 Since even non-equilibrium MWC models incorporating energy expenditure and non-steady behavior could not explain the *zelda*<sup>-</sup> data, we further revised the assumptions of our model in an effort to quantitatively predict the regulation of  $t_{on}$  along the embryo. In accordance with the MWC model of allostery, all of our theoretical treatments so far have posited that the DNA is an allosteric  
365 molecule that transitions between open and closed states as a result of thermal fluctuations (Narula and Igoshin, 2010; Mirny, 2010; Marzen et al., 2013; Phillips et al., 2013).



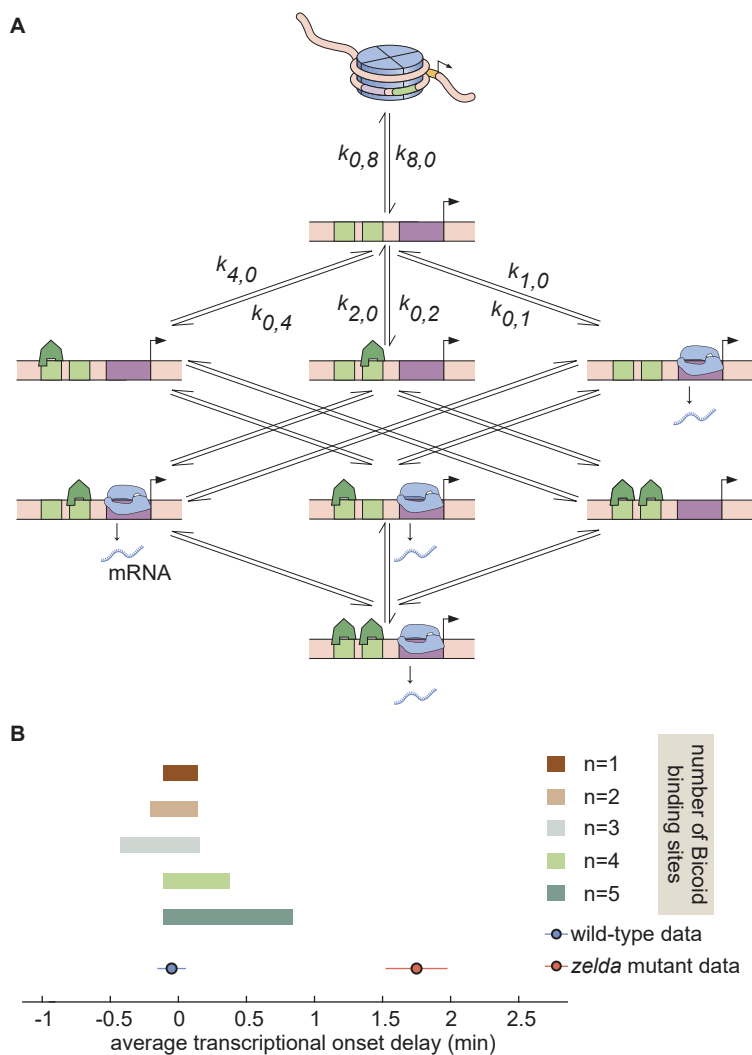

Figure 6: Non-equilibrium MWC model of transcriptional regulation cannot predict the observed  $t_{on}$  delay. (A) Model that makes no assumptions about the relative transition rates between states or about energy expenditure. Each transition rate  $i, j$  represents the rate of switching from state  $i$  to state  $j$ . See Section S7.1 for details on how the individual states are labeled. (B) Exploration of average  $t_{on}$  delay attainable by the non-equilibrium MWC models as a function of the number of Bicoid binding sites compared to the experimentally obtained values corresponding to the wild-type and *zelda*<sup>-</sup> mutant backgrounds. While the non-equilibrium MWC model can explain the wild-type data, the exploration reveals that it fails to explain the *zelda*<sup>-</sup> data, for up to five Bicoid binding sites.

In the MWC models considered here, the presence of Zelda and Bicoid does not affect the microscopic rates of DNA opening and closing; rather, their binding to open DNA shifts the equilibrium of the DNA conformation toward the accessible state. However, recent biochemical work has suggested that Zelda and Bicoid play a more direct role in making chromatin accessible. Specifically, Zelda has been implicated in the acetylation of chromatin, a histone modification that renders nucleosomes unstable and increases DNA accessibility (Li et al., 2014b; Li and Eisen, 2018). Further, Bicoid has been shown to interact with the co-activator dCBP, which possesses histone acetyltransferase activity (Fu et al., 2004). Additionally, recent studies by Desponds et al. (2016) in *hunchback* and by Dufourt et al. (2018) in *snail* have proposed the existence of multiple transcriptionally silent steps that the promoter needs to transition through before transcriptional onset. These steps could correspond to, for example, the recruitment of histone modifiers, nucleosome remodelers, and the transcriptional machinery (Li et al., 2014b; Park et al., 2019), or to the step-wise unraveling of discrete histone-DNA contacts (Culkin et al., 2017). Further, Dufourt et al. (2018) proposed that Zelda plays a role in modulating the number of these steps and their transition rates.

We therefore proposed a model of transcription factor-driven chromatin accessibility in which, in order for the DNA to become accessible and transcription to ensue, the system slowly and irreversibly transitions through  $m$  transcriptionally silent states (Section S8.1; Fig. 7A). We assume that the transitions between these states are all governed by the same rate constant  $\pi$ . Finally, in a stark deviation from the MWC framework, we posit that these transitions can be catalyzed by the presence of Bicoid and Zelda such that

$$\pi = c_b[Bicoid] + c_z[Zelda]. \quad (6)$$

Here,  $\pi$  describes the rate (in units of inverse time) of each irreversible step, expressed as a sum of rates that depend separately on the concentrations of Bicoid and Zelda, and  $c_b$  and  $c_z$  are rate constants that scale the relative contribution of each transcription factor to the overall rate.

390 In this model of transcription factor-driven chromatin accessibility, once the  
DNA becomes irreversibly accessible after transitioning through the  $m$  non-  
productive states, we assume that, for the rest of the nuclear cycle, the system  
equilibrates rapidly such that the probability of it occupying any of its possible  
states is still described by equilibrium statistical mechanics. Like in our previ-  
395 ous models, transcription only occurs in the RNAP-bound states, obeying the  
occupancy hypothesis. Further, our model assumes that if the transcriptional  
onset time of a given nucleus exceeds that of the next mitosis, this nucleus will  
not engage in transcription.

Unlike the thermodynamic and non-equilibrium MWC models, this model of  
400 transcription factor-driven chromatin accessibility quantitatively recapitulated  
the observation that posterior nuclei do not engage in transcription, the initial  
rate of RNAP loading, and  $t_{on}$  for both the wild-type and *zelda*<sup>-</sup> mutant data  
(Fig. 7B and C). Additionally, we found that a minimum of  $m = 5$  steps was  
required to sufficiently explain the data (Section S8.2; Fig. S13). Interestingly,  
405 unlike all previously considered models, the model of transcription factor-driven  
chromatin accessibility did not require mitotic repression to explain  $t_{on}$  (Sec-  
tions S3.1 and S8.1). Instead, the timing of transcriptional output arose directly  
from the model's initial irreversible transitions (Fig. S13), obviating the need for  
an arbitrary suppression window in the beginning of the nuclear cycle. The only  
410 substantive disagreement between our theoretical model and the experimental  
data was that the model predicted that no nuclei should transcribe posterior  
to 60% of the embryo length, whereas no transcription posterior to 40% was  
experimentally observed in the embryo (Fig. 7B and C). Finally, note that this  
model encompasses a much larger region of parameter space than the equilib-  
415 rium and non-equilibrium MWC models and, as expected from the agreement  
between model and experiment described above, contained both the wild-type  
and *zelda*<sup>-</sup> data points within its domain (Fig. 7D).

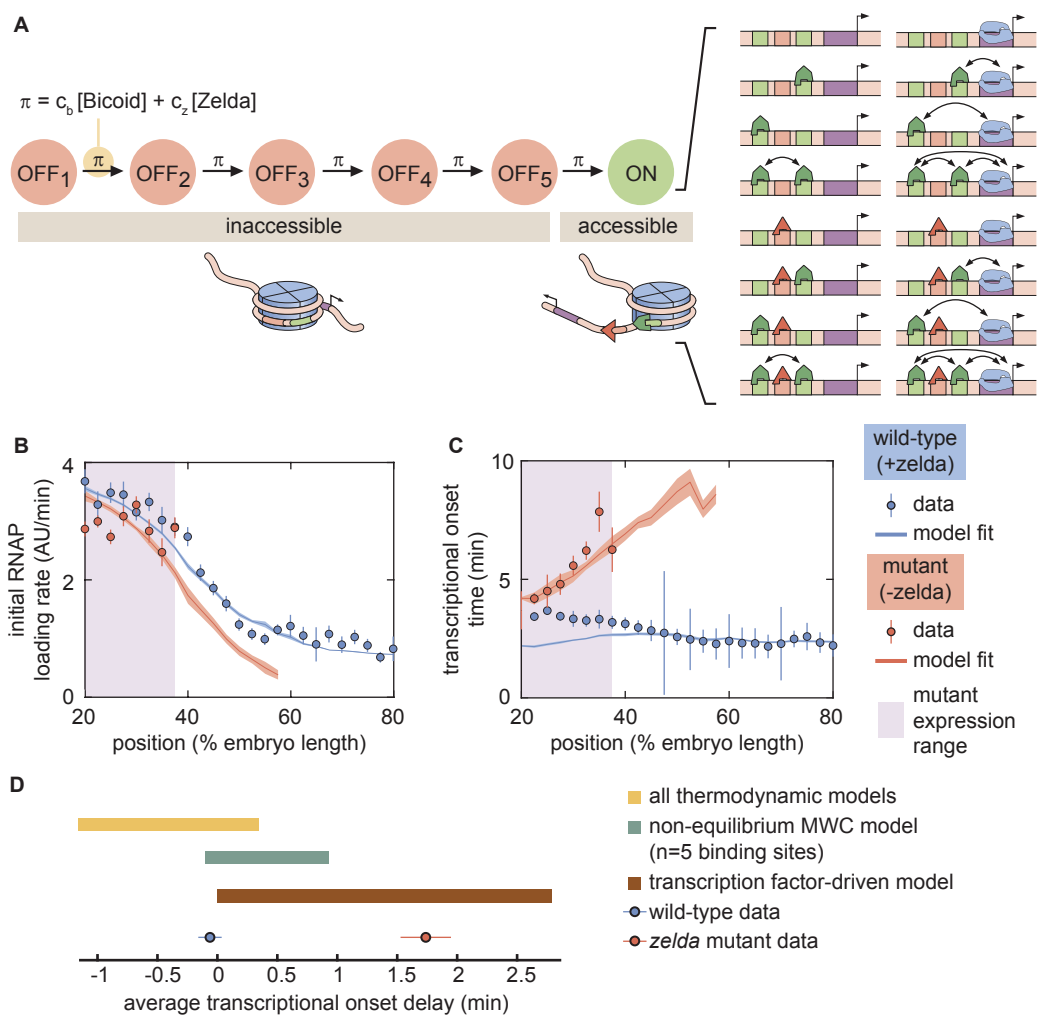

Figure 7: A model of transcription factor-driven chromatin accessibility is sufficient to recapitulate *hunchback* transcriptional dynamics. (A) Overview of the proposed model, with five ( $m = 5$ ) effectively irreversible Zelda and/or Bicoid-mediated intermediate transitions from the inaccessible to the accessible states. (B,C) Experimentally fitted (B) initial RNAP loading rates and (C)  $t_{on}$  for wild-type and *zelda*<sup>-</sup> embryos using a single set of parameters and assuming six Bicoid binding sites. (D) The domain of average  $t_{on}$  delay covered by this transcription factor-driven chromatin accessibility model (brown rectangle) is much larger than those of the generalized thermodynamic model (yellow rectangle) and the non-equilibrium MWC models (green rectangle), and easily encompasses both experimental datasets (points). (B-D, error bars represent standard error of the mean over multiple embryos).

### 3. Discussion

For four decades, thermodynamic models rooted in equilibrium statistical  
420 mechanics have constituted the null theoretical model for calculating how the  
number, placement and affinity of transcription factor binding sites on regula-  
tory DNA dictates gene expression (Bintu et al., 2005a,b). Further, the MWC  
mechanism of allostery has been proposed as an extra layer that allows thermo-  
dynamic and more general non-equilibrium models to account for the regulation  
425 of chromatin accessibility (Mirny, 2010; Narula and Igoshin, 2010; Marzen et al.,  
2013).

In this investigation, we tested thermodynamic and non-equilibrium MWC  
models of chromatin accessibility and transcriptional regulation in the context  
of *hunchback* activation in the early embryo of the fruit fly *D. melanogaster*  
430 (Driever et al., 1989; Nien et al., 2011; Xu et al., 2014). While chromatin  
state (accessibility, post-translational modifications) is highly likely to influence  
transcriptional dynamics of associated promoters, specifically measuring the in-  
fluence of chromatin state on transcriptional dynamics is challenging because  
of the sequential relationship between changes in chromatin state and tran-  
435 scriptional regulation. However, the *hunchback* P2 minimal enhancer provides a  
unique opportunity to dissect the relative contribution of chromatin regulation  
on transcriptional dynamics because, in the early embryo, chromatin accessibil-  
ity at *hunchback* is granted by both Bicoid and Zelda (Hannon et al., 2017). The  
degree of *hunchback* transcriptional activity, however, is regulated directly by  
440 Bicoid (Driever and Nusslein-Volhard, 1989; Driever et al., 1989; Struhl et al.,  
1989). Therefore, while genetic elimination of Zelda function interferes with  
acquisition of full chromatin accessibility, the *hunchback* locus retains a measur-  
able degree of accessibility and transcriptional activity stemming from Bicoid  
function, allowing for a quantitative determination of the contribution of Zelda-  
445 dependent chromatin accessibility on the transcriptional dynamics of the locus.

With these attributes in mind, we constructed a thermodynamic MWC  
model which, given a set of parameters, predicted an output rate of *hunch-*

*back* transcription as a function of the input Bicoid and Zelda concentrations (Fig. 2B). In order to test this model, it was necessary to acknowledge that development is not in steady-state, and that both Bicoid and Zelda concentrations  
450 change dramatically in space and time (Fig. 3A and B). As a result, we went beyond widespread steady-state descriptions of development and introduced a novel approach that incorporated transient dynamics of input transcription-factor concentrations in order to predict the instantaneous output transcriptional dynamics of *hunchback* (Fig. 3C). Given input dynamics quantified with  
455 fluorescent protein fusions to Bicoid and Zelda, we both predicted output transcriptional activity and measured it with an MS2 reporter (Figs. 3D and 4B).

This approach revealed that the thermodynamic MWC model sufficiently predicts the timing of the onset of transcription and the subsequent initial rate  
460 of RNAP loading as a function of Bicoid and Zelda concentration. However, when confronted with the much simpler case of Bicoid-only regulation in a *zelda* mutant, the thermodynamic MWC model failed to account for the observations that only a fraction of nuclei along the embryo engaged in transcription, and that the transcriptional onset time of those nuclei that do transcribe was significantly delayed with respect to the wild-type setting (Fig. 4D, E, G, and H).  
465 Our systematic exploration of all thermodynamic models (over a reasonable parameter range) showed that that no thermodynamic model featuring regulation by Bicoid alone could quantitatively recapitulate the measurements performed in the *zelda* mutant background (Fig. 5C, yellow rectangle).

This disagreement could be resolved by invoking an unknown transcription factor that regulates the *hunchback* reporter in addition to Bicoid. However, at the early stages of development analyzed here, such a factor would need to be both maternally provided and patterned in a spatial gradient to produce the observed position-dependent transcriptional onset times. To our knowledge,  
475 none of the known maternal genes regulate the expression of this *hunchback* reporter in such a fashion (Chen et al., 2012; Perry et al., 2012; Xu et al., 2014). We conclude that the MWC thermodynamic model cannot accurately predict *hunchback* transcriptional dynamics.

To explore non-equilibrium models, we retained the MWC mechanism of  
480 chromatin accessibility, but did not demand that the accessible and inaccessible  
states be in thermal equilibrium. Further, we allowed for the process of Bicoid  
and RNAP binding, as well as their interactions, to consume energy. For up  
to five Bicoid binding sites, no set of model parameters could quantitatively  
account for the transcriptional onset delays in the *zelda* mutant background  
485 (Fig. 6B). While we were unable to investigate models with more than five Bi-  
coid binding sites due to computational complexity (Estrada et al., 2016), the  
substantial distance in parameter space between the mutant data and the in-  
vestigated models (Fig. 6B) suggested that a successful model with more than  
five Bicoid binding sites would probably operate near the limits of its explana-  
490 tory power, similar to the conclusions from studies that explored *hunchback*  
regulation under the steady-state assumption (Park et al., 2019). Thus, despite  
the simplicity and success of the MWC model in predicting the effects of pro-  
tein allostery in a wide range of biological contexts (Keymer et al., 2006; Swem  
et al., 2008; Martins and Swain, 2011; Marzen et al., 2013; Rapp and Yifrach,  
495 2017; Razo-Mejia et al., 2018; Chure et al., 2019; Rapp and Yifrach, 2019), the  
observed transcriptional onset times could not be described by any previously  
proposed thermodynamic MWC mechanism of chromatin accessibility, or even  
by a more generic non-equilibrium MWC model in which energy is continuously  
dissipated (Tu, 2008; Kim and O'Shea, 2008; Narula and Igoshin, 2010; Estrada  
500 et al., 2016; Wang et al., 2017).

Since Zelda is associated with histone acetylation, which is correlated with  
increased chromatin accessibility (Li et al., 2014b; Li and Eisen, 2018), and  
Bicoid interacts with the co-activator dCBP, which has histone acetyltransferase  
activity (Fu et al., 2004; Fu and Ma, 2005; Park et al., 2019), we suspect that  
505 both Bicoid and Zelda actively drive DNA accessibility. A molecular pathway  
shared by Bicoid and Zelda to render chromatin accessible is consistent with  
our results, and with recent genome-wide experiments showing that Bicoid can  
rescue the function of Zelda-dependent enhancers at high enough concentrations  
(Hannon et al., 2017). Thus, the binding of Bicoid and Zelda, rather than just

510 biasing the equilibrium of the open chromatin state as in the MWC mechanism, may trigger a set of molecular events that locks DNA into an accessible state. In addition, the promoters of *hunchback* (Desponds et al., 2016) and *snail* (Dufourt et al., 2018) may transition through a set of intermediate, non-productive states before transcription begins.

515 We therefore explored a model in which Bicoid and Zelda catalyze the transition of chromatin into the accessible state via a series of slow, effectively irreversible steps. These steps may be interpreted as energy barriers that are overcome through the action of Bicoid and Zelda, consistent with the coupling of these transcription factors to histone modifiers, nucleosome remodelers (Fu  
520 et al., 2004; Li et al., 2014b; Li and Eisen, 2018; Park et al., 2019), and with the step-wise breaking of discrete histone-DNA contacts to unwrap nucleosomal DNA (Culkin et al., 2017). In this model, once accessible, the chromatin remains in that state and the subsequent activation of *hunchback* by Bicoid is described by a thermodynamic model.

525 Crucially, this transcription factor-driven chromatin accessibility model successfully replicated all of our experimental observations. A minimum of five intermediate transcriptionally silent states were necessary to explain our data (Figs. 7D and S13C). Interestingly, recent work dissecting the transcriptional onset time distribution of *snail* suggested the existence of three such intermediate  
530 steps in the context of that gene (Dufourt et al., 2018). These intermediate steps may reveal fundamental constraints for transcriptional regulation in the fruit fly. Intriguingly, accounting for the intermediate states obviated the need for the *ad hoc* imposition of a mitotic repression window (Sections S3.1 and S8.1), which was required in the thermodynamic MWC model (Fig. S6). Our results suggest  
535 a mechanistic interpretation of the phenomenon of mitotic repression after anaphase, where the promoter must traverse through intermediary states before transcriptional onset can occur. Finally, given that, as in *hunchback*, the removal and addition of Zelda modulates the timing of transcriptional onset of *sog* and *snail* (Dufourt et al., 2018; Yamada et al., 2019), we speculate that  
540 transcription factor-driven chromatin accessibility may also be at play in these



pathways.

These clues into the molecular mechanisms of action of Bicoid, Zelda, and their associated modifications to the chromatin landscape pertain to a time scale of a few minutes, a temporal scale that is inaccessible with widespread genome-  
545 wide and fixed-tissue approaches. Here, we revealed the regulatory action of Bicoid and Zelda by utilizing the dynamic information provided by live imaging to analyze the transient nature of the transcriptional onset time, highlighting the need for descriptions of development that go beyond steady state and acknowledge the highly dynamic changes in transcription-factor concentrations  
550 that drive developmental programs.

While we showed that one model incorporating transcription factor-driven chromatin accessibility could recapitulate *hunchback* transcriptional regulation by Bicoid and Zelda, and is consistent with molecular evidence on the modes of action of these transcription factors, other models may have comparable explanatory power. In the future, a systematic exploration of different classes of  
555 models and their unique predictions will identify measurements that determine *which* specific model is the most appropriate description of transcriptional regulation in development and *how* it is implemented at the molecular level. While all the analyses in this work relied on mean levels of input concentrations and  
560 output transcription levels, detailed studies of single-cell features of transcriptional dynamics such as the distribution of transcriptional onset times (Narula and Igoshin, 2010; Dufourt et al., 2018) could shed light on these chromatin-regulating mechanisms. Simultaneous measurement of local transcription-factor concentrations at sites of transcription and of transcriptional initiation with high  
565 spatiotemporal resolution, such as afforded by lattice light-sheet microscopy (Mir et al., 2018), could provide further information about chromatin accessibility dynamics. Finally, different theoretical models may make distinct predictions about the effect of modulating the number, placement, and affinity of Bicoid and Zelda sites (and even of nucleosomes) in the *hunchback* enhancer.  
570 These models could be tested with future experiments that implement these modulations in reporter constructs.

In sum, here we engaged in a theory-experiment dialogue to respond to the theoretical challenges of proposing a passive MWC mechanism for chromatin accessibility in eukaryotes (Mirny, 2010; Narula and Igoshin, 2010; Marzen et al.,  
575 2013); we also questioned the suitability of thermodynamic models in the context of development (Estrada et al., 2016). At least regarding the activation of *hunchback*, and likely similar developmental genes such as *snail* and *sog* (Dufourt et al., 2018; Yamada et al., 2019), we speculate that Bicoid and Zelda actively drive chromatin accessibility, possibly through histone acetylation. Once chromatin becomes accessible, thermodynamic models can predict *hunchback* trans-  
580 cription without the need to invoke energy expenditure and non-equilibrium models. Regardless of whether we have identified the only possible model of chromatin accessibility and regulation, we have demonstrated that this dialogue between theoretical models and the experimental testing of their predictions at  
585 high spatiotemporal resolution is a powerful tool for biological discovery. The new insights afforded by this dialogue will undoubtedly refine theoretical descriptions of transcriptional regulation as a further step toward a predictive understanding of cellular decision-making in development.

### Acknowledgments

590 We are grateful to Jack Bateman, Jacques Bothma, Mike Eisen, Jeremy Gunawardena, Jane Kondev, Oleg Igoshin, Rob Phillips, Christine Rushlow and Peter Whitney for their guidance and comments on our manuscript. We thank Kenneth Irvine and Yuanwang Pan for providing the *his-irfp* fly line. This work was supported by the Burroughs Wellcome Fund Career Award at  
595 the Scientific Interface, the Sloan Research Foundation, the Human Frontiers Science Program, the Searle Scholars Program, the Shurl and Kay Curci Foundation, the Hellman Foundation, the NIH Directors New Innovator Award (DP2 OD024541-01), and an NSF CAREER Award (1652236) (HGG), an NSF GRFP (DGE 1752814) and UC Berkeley Chancellor's Fellowship (EE), and the DoD  
600 NDSEG graduate fellowship (JL).

## 4. Materials and Methods

### 4.1. Predicting Zelda binding sites

Zelda binding sites in the *hunchback* promoter were identified as heptamers scoring 3 or higher using a Zelda alignment matrix (Harrison et al., 2011) and the Advanced PASTER entry form online (<http://stormo.wustl.edu/consensus/cgi-bin/Server/Interface/patser.cgi>) (Hertz et al., 1990; Hertz and Stormo, 1999). PATSER was run with setting “Seq. Alphabet and Normalization” as “a:t 3 g:c 2” to provide the approximate background frequencies as annotated in the Berkeley Drosophila Genome Project (BDGP)/Celera Release 1. Reverse complementary sequences were also scored.

### 4.2. Fly Strains

Bicoid nuclear concentration was imaged in embryos from line *yw; his2av-mrfp1;bicoidE1,egfp-bicoid* (Gregor et al., 2007b). Similarly, Zelda nuclear concentration was determined by imaging embryos from line *sfgfp-zelda;+;his-irfp*. The *sfgfp-zelda* transgene was obtained from Hamm et al. (2017) and the *his-iRFP* transgene is courtesy of Kenneth Irvine and Yuanwang Pan.

Transcription from the *hunchback* promoter was measured by imaging embryos resulting from crossing female virgins *yw;HistoneRFP;MCP-NoNLS(2)* with male *yw;P2P-MS2-LacZ/cyo;+* (Garcia et al., 2013).

In order to image transcription in embryos lacking maternally deposited Zelda protein, we crossed mother flies whose germline was *w, his2av-mrfp1,zelda(294),FRT19A;+;MCP-egfp(4F)/+* obtained through germline clones (see below) with fathers carrying the *yw;P2P-MS2-LacZ/cyo;+* reporter. The *zelda(294)* transgene is courtesy of Christine Rushlow (Liang et al., 2008). The *MCP-egfp(4F)* transgene expresses approximately double the amount of MCP than the *MCP-egfp(2)* (Garcia et al., 2013), ensuring similar levels of MCP in the embryo in all experiments.

Imaging Bicoid nuclear concentration in embryos lacking maternally deposited Zelda protein was accomplished by replacing the *MCP-egfp(4F)*

630 transgene described in the previous paragraph with the *bicoidE1, egfp-bicoid* transgene used for imaging nuclear Bicoid in a wildtype background. We crossed mother flies whose germline was *w, his2av-mrfp1, zelda(294), FRT19A;+; bicoidE1, egfp-bicoid/+* obtained through germline clones (see below) with *yw* fathers.

#### 635 4.3. *Zelda* germline clones

In order to generate mother flies containing a germline homozygous null for *zelda*, we first crossed virgin females of *w, his2av-mrfp1, zelda(294), FRT19A/FM7, y, B;+; MCP-egfp(4F)/TM3, ser* (or *w, his2av-mrfp1, zelda(294), FRT19A;+; bicoidE1, egfp-bicoid/+* to image nuclear Bicoid) with males of *ovoD, hs-FLP, FRT19A;+;+* (Liang et al., 2008). The resulting 640 heterozygotic offspring were heat-shocked in order to create maternal germline clones as described in Liang et al. (2008). The resulting female virgins were crossed with male *yw; P2P-MS2-LacZ/cyo;+* (Garcia et al., 2013) to image transcription or male *yw* to image nuclear Bicoid concentration.

645 Male offspring are null for zygotic *zelda*. Female offspring are heterozygotic for functional *zelda*, but zygotic *zelda* is not transcribed until nuclear cycle 14 (Liang et al., 2008), which occurs after the analysis in this work. All embryos lacking maternally deposited Zelda showed aberrant morphology in nuclear size and shape (data not shown), as previously reported (Liang et al., 2008; Staudt 650 et al., 2006).

#### 4.4. *Sample preparation and data collection*

Sample preparation followed procedures described in Bothma et al. (2014), Garcia and Gregor (2018), and Lammers et al. (2019).

Embryos were collected and mounted in halocarbon oil 27 between a semipermeable membrane (Lumox film, Starstedt, Germany) and a coverslip. Data 655 collection was performed using a Leica SP8 scanning confocal microscope (Leica Microsystems, Biberach, Germany). Imaging settings for the MS2 experiments were the same as in Lammers et al. (2019), except the Hybrid Detector (HyD)

for the His-RFP signal used a spectral window of 556-715 nm. The settings for  
660 the Bicoid-GFP measurements were the same, except for the following. The  
power setting for the 488 nm line was 10  $\mu$ W. The confocal stack was only 10  
slices in this case, rather than 21, resulting in a spacing of 1.11  $\mu$ m between  
planes. The images were acquired at a time resolution of 30 s, using an image  
resolution of 512 x 128 pixels.

665 The settings for the Zelda-sfGFP measurements were the same as the Bicoid-  
GFP measurements, except different laser lines were used for the different fluo-  
rophores. The sf-GFP excitation line was set at 485 nm, using a power setting  
of 10  $\mu$ W. The His-iRFP excitation line was set at 670 nm. The HyD for the  
His-iRFP signal was set at a 680-800 nm spectral window. All specimens were  
670 imaged over the duration of nuclear cycle 13.

#### 4.5. Image analysis

Images were analyzed using custom-written software following the protocol  
in Garcia et al. (2013). Briefly, this procedure involved segmenting individual  
nuclei using the histone signal as a nuclear mask, segmenting each transcription  
675 spot based on its fluorescence, and calculating the intensity of each MCP-GFP  
transcriptional spot inside a nucleus as a function of time.

Additionally, the nuclear protein fluorescences of the Bicoid-GFP and Zelda-  
sfGFP fly lines were calculated as follows. Using the histone-labeled nuclear  
mask for each individual nucleus, the fluorescence signal within the mask was  
680 extracted in xyz, as well as through time. For each timepoint, the xy signal was  
averaged to give an average nuclear fluorescence as a function of z and time.  
This signal was then maximum projected in z, resulting in an average nuclear  
concentration as a function of time, per single nucleus. These single nucleus  
concentrations were then averaged over anterior-posterior position to create the  
685 protein concentrations reported in the main text.

#### 4.6. Data Analysis

All fits in the main text were performed by minimizing the least-squares error  
between the data and the model predictions. Unless stated otherwise, error bars

reflect standard error of the mean over multiple embryo measurements. See  
690 Section S2.1 for more details on how this was carried out for model predictions.

## References

- Ackers, G.K., Johnson, A.D., Shea, M.A., 1982. Quantitative model for gene regulation by lambda phage repressor. *Proc Natl Acad Sci U S A* 79, 1129–33.
- Adams, C.C., Workman, J.L., 1995. Binding of disparate transcriptional activators to nucleosomal DNA is inherently cooperative. *Molecular and Cellular Biology* 15, 1405–1421. doi:10.1128/mcb.15.3.1405.
- Ahsendorf, T., Wong, F., Eils, R., Gunawardena, J., 2014. A framework for modelling gene regulation which accommodates non-equilibrium mechanisms. *BMC Biol* 12, 102. doi:10.1186/s12915-014-0102-4.
- 700 Bai, L., Ondracka, A., Cross, F.R., 2011. Multiple sequence-specific factors generate the nucleosome-depleted region on *cln2* promoter. *Mol Cell* 42, 465–76. doi:10.1016/j.molcel.2011.03.028.
- Bakk, A., Metzler, R., Sneppen, K., 2004. Sensitivity of *or* in phage lambda. *Biophys J* 86, 58–66.
- 705 Berg, H.C., Purcell, E.M., 1977. Physics of chemoreception. *Biophys J* 20, 193–219. doi:S0006-3495(77)85544-6[pii]10.1016/S0006-3495(77)85544-6.
- Berrocal, A., Lammers, N.C., Garcia, H.G., Eisen, M.B., 2018. Kinetic sculpting of the seven stripes of the drosophila even-skipped gene. bioRxiv doi:10.1101/335901.
- 710 Bertrand, E., Chartrand, P., Schaefer, M., Shenoy, S.M., Singer, R.H., Long, R.M., 1998. Localization of *ash1* mRNA particles in living yeast. *Mol Cell* 2, 437–45. doi:S1097-2765(00)80143-4[pii].
- Bintu, L., Buchler, N.E., Garcia, H.G., Gerland, U., Hwa, T., Kondev, J., Kuhlman, T., Phillips, R., 2005a. Transcriptional regulation by the numbers: applications. *Curr Opin Genet Dev* 15, 125–35.
- 715

- Bintu, L., Buchler, N.E., Garcia, H.G., Gerland, U., Hwa, T., Kondev, J., Phillips, R., 2005b. Transcriptional regulation by the numbers: models. *Curr Opin Genet Dev* 15, 116–24.
- Blythe, S.A., Wieschaus, E.F., 2016. Establishment and maintenance of heritable chromatin structure during early drosophila embryogenesis. *Elife* 5. doi:10.7554/eLife.20148. 720
- Bolouri, H., Davidson, E.H., 2003. Transcriptional regulatory cascades in development: initial rates, not steady state, determine network kinetics. *Proc Natl Acad Sci U S A* 100, 9371–6. doi:10.1073/pnas.1533293100.
- Bothma, J.P., Garcia, H.G., Esposito, E., Schlissel, G., Gregor, T., Levine, M., 2014. Dynamic regulation of eve stripe 2 expression reveals transcriptional bursts in living drosophila embryos. *Proc Natl Acad Sci U S A* 111, 1059810603. doi:10.1073/pnas.1410022111. 725
- Bothma, J.P., Garcia, H.G., Ng, S., Perry, M.W., Gregor, T., Levine, M., 2015. Enhancer additivity and non-additivity are determined by enhancer strength in the drosophila embryo. *Elife* 4. doi:10.7554/eLife.07956. 730
- Brewster, R.C., Jones, D.L., Phillips, R., 2012. Tuning Promoter Strength through RNA Polymerase Binding Site Design in Escherichia coli. *PLoS Computational Biology* 8. doi:10.1371/journal.pcbi.1002811.
- Brewster, R.C., Weinert, F.M., Garcia, H.G., Song, D., Rydenfelt, M., Phillips, R., 2014. The transcription factor titration effect dictates level of gene expression. *Cell* 156, 1312–23. doi:10.1016/j.cell.2014.02.022. 735
- Buchler, N.E., Gerland, U., Hwa, T., 2003. On schemes of combinatorial transcription logic. *Proc Natl Acad Sci U S A* 100, 5136–41.
- Chen, H., Xu, Z., Mei, C., Yu, D., Small, S., 2012. A system of repressor gradients spatially organizes the boundaries of bicoid-dependent target genes. *Cell* 149, 618–29. doi:10.1016/j.cell.2012.03.018. 740

- Chure, G., Razo-Mejia, M., Belliveau, N.M., Einav, T., Kaczmarek, Z.A., Barnes, S.L., Lewis, M., Phillips, R., 2019. Predictive shifts in free energy couple mutations to their phenotypic consequences. Proc Natl Acad Sci U S A 116, 18275–18284. doi:10.1073/pnas.1907869116.
- 745
- Cui, L., Murchland, I., Shearwin, K.E., Dodd, I.B., 2013. Enhancer-like long-range transcriptional activation by lambda ci-mediated dna looping. Proc Natl Acad Sci U S A 110, 2922–7. doi:10.1073/pnas.1221322110.
- Culkin, J., de Bruin, L., Tompitak, M., Phillips, R., Schiessel, H., 2017. The role of dna sequence in nucleosome breathing. Eur Phys J E Soft Matter 40, 106. doi:10.1140/epje/i2017-11596-2.
- 750
- Desponds, J., Tran, H., Ferraro, T., Lucas, T., Perez Romero, C., Guillou, A., Fradin, C., Coppey, M., Dostatni, N., Walczak, A.M., 2016. Precision of readout at the hunchback gene: Analyzing short transcription time traces in living fly embryos. PLoS Comput Biol 12, e1005256. doi:10.1371/journal.pcbi.1005256.
- 755
- Driever, W., Nusslein-Volhard, C., 1988a. The bicoid protein determines position in the drosophila embryo in a concentration-dependent manner. Cell 54, 95–104.
- 760
- Driever, W., Nusslein-Volhard, C., 1988b. A gradient of bicoid protein in drosophila embryos. Cell 54, 83–93.
- Driever, W., Nusslein-Volhard, C., 1989. The bicoid protein is a positive regulator of hunchback transcription in the early drosophila embryo. Nature 337, 138–43. doi:10.1038/337138a0.
- 765
- Driever, W., Thoma, G., Nusslein-Volhard, C., 1989. Determination of spatial domains of zygotic gene expression in the drosophila embryo by the affinity of binding sites for the bicoid morphogen. Nature 340, 363–7. doi:10.1038/340363a0.



- 770 Dufourt, J., Trullo, A., Hunter, J., Fernandez, C., Lazaro, J., Dejean, M.,  
Morales, L., Nait-Amer, S., Schulz, K.N., Harrison, M.M., Favard, C., Rad-  
ulescu, O., Lagha, M., 2018. Temporal control of gene expression by the  
pioneer factor zelda through transient interactions in hubs. *Nat Commun* 9,  
5194. doi:10.1038/s41467-018-07613-z.
- 775 Edgar, B.A., Odell, G.M., Schubiger, G., 1987. Cytoarchitecture and the pat-  
tarning of fushi tarazu expression in the drosophila blastoderm. *Genes Dev*  
1, 1226–37.
- Edgar, B.A., Schubiger, G., 1986. Parameters controlling transcriptional activa-  
tion during early drosophila development. *Cell* 44, 871–7. doi:0092-8674(86)  
780 90009-7[pii].
- Endy, D., 2005. Foundations for engineering biology. *Nature* 438, 449–53.  
doi:nature04342[pii]10.1038/nature04342.
- Estrada, J., Wong, F., DePace, A., Gunawardena, J., 2016. Information in-  
tegration and energy expenditure in gene regulation. *Cell* 166, 234–44.  
785 doi:10.1016/j.cell.2016.06.012.
- Fakhouri, W.D., Ay, A., Sayal, R., Dresch, J., Dayringer, E., Arnosti, D.N.,  
2010. Deciphering a transcriptional regulatory code: modeling short-range re-  
pression in the drosophila embryo. *Mol Syst Biol* 6, 341. doi:msb200997[pii]  
10.1038/msb.2009.97.
- 790 Foo, S.M., Sun, Y., Lim, B., Ziukaite, R., O'Brien, K., Nien, C.Y., Kirov,  
N., Shvartsman, S.Y., Rushlow, C.A., 2014. Zelda potentiates morphogen  
activity by increasing chromatin accessibility. *Current Biology* 24, 1341–1346.  
doi:10.1016/j.cub.2014.04.032.
- Fu, D., Ma, J., 2005. Interplay between positive and negative activities that  
795 influence the role of bicoid in transcription. *Nucleic Acids Res* 33, 3985–93.  
doi:10.1093/nar/gki691.

- Fu, D., Wen, Y., Ma, J., 2004. The co-activator creb-binding protein participates in enhancer-dependent activities of bicoid. *J Biol Chem* 279, 48725–33. doi:10.1074/jbc.M407066200.
- 800 Fussner, E., Ching, R.W., Bazett-Jones, D.P., 2011. Living without 30nm chromatin fibers. *Trends in Biochemical Sciences* 36, 1–6. doi:10.1016/j.tibs.2010.09.002.
- Garcia, H.G., Gregor, T., 2018. *Live Imaging of mRNA Synthesis in Drosophila*. Springer New York, New York, NY. pp. 349–357.
- 805 Garcia, H.G., Kondev, J., Orme, N., Theriot, J.A., Phillips, R., 2007. A first exposure to statistical mechanics for life scientists. arXiv preprint arXiv:0708.1899 .
- Garcia, H.G., Phillips, R., 2011. Quantitative dissection of the simple repression input-output function. *Proc Natl Acad Sci U S A* 108, 12173–8. doi:1015616108[pri]10.1073/pnas.1015616108.
- 810 Garcia, H.G., Sanchez, A., Boedicker, J.Q., Osborne, M., Gelles, J., Kondev, J., Phillips, R., 2012. Operator sequence alters gene expression independently of transcription factor occupancy in bacteria. *Cell Rep* 2, 150–61. doi:10.1016/j.celrep.2012.06.004.
- 815 Garcia, H.G., Tikhonov, M., Lin, A., Gregor, T., 2013. Quantitative imaging of transcription in living drosophila embryos links polymerase activity to patterning. *Curr Biol* 23, 2140–5. doi:10.1016/j.cub.2013.08.054.
- Gertz, J., Siggia, E.D., Cohen, B.A., 2009. Analysis of combinatorial cis-regulation in synthetic and genomic promoters. *Nature* 457, 215–8.
- 820 Giorgetti, L., Siggers, T., Tiana, G., Caprara, G., Notarbartolo, S., Corona, T., Pasparakis, M., Milani, P., Bulyk, M.L., Natoli, G., 2010. Noncooperative interactions between transcription factors and clustered dna binding sites enable graded transcriptional responses to environmental inputs. *Mol Cell* 37, 418–28. doi:10.1016/j.molcel.2010.01.016.

- 825 Gottesfeld, J.M., Forbes, D.J., 1997. Mitotic repression of the transcriptional machinery. *Trends Biochem Sci* 22, 197–202.
- Gregor, T., Tank, D.W., Wieschaus, E.F., Bialek, W., 2007a. Probing the limits to positional information. *Cell* 130, 153–64.
- Gregor, T., Wieschaus, E.F., McGregor, A.P., Bialek, W., Tank, D.W., 2007b.  
830 Stability and nuclear dynamics of the bicoid morphogen gradient. *Cell* 130, 141–52.
- Hamm, D.C., Larson, E.D., Nevil, M., Marshall, K.E., Bondra, E.R., Harrison, M.M., 2017. A conserved maternal-specific repressive domain in *Zelda* revealed by Cas9-mediated mutagenesis in *Drosophila melanogaster*. *PLOS Genetics* 13, e1007120. URL: <http://journals.plos.org/plosgenetics/article?id=10.1371/journal.pgen.1007120>, doi:10.1371/journal.pgen.1007120.  
835
- Hammar, P., Wallden, M., Fange, D., Persson, F., Baltekin, O., Ullman, G., Leroy, P., Elf, J., 2014. Direct measurement of transcription factor dissociation excludes a simple operator occupancy model for gene regulation. *Nat Genet* 46, 405–8. doi:10.1038/ng.2905.  
840
- Hannon, C.E., Blythe, S.A., Wieschaus, E.F., 2017. Concentration dependent chromatin states induced by the bicoid morphogen gradient. *Elife* 6. doi:10.7554/eLife.28275.
- 845 Hansen, A.S., O’Shea, E.K., 2015. Cis Determinants of Promoter Threshold and Activation Timescale. *Cell Reports* 12, 1226–1233. URL: <http://dx.doi.org/10.1016/j.celrep.2015.07.035>, doi:10.1016/j.celrep.2015.07.035.
- Harrison, M.M., Li, X.Y., Kaplan, T., Botchan, M.R., Eisen, M.B., 2011.  
850 *Zelda* binding in the early *drosophila melanogaster* embryo marks regions subsequently activated at the maternal-to-zygotic transition. *PLoS Genet* 7, e1002266. doi:10.1371/journal.pgen.1002266.

- He, H.H., Meyer, C.A., Shin, H., Bailey, S.T., Wei, G., Wang, Q., Zhang, Y.,  
Xu, K., Ni, M., Lupien, M., Mieczkowski, P., Lieb, J.D., Zhao, K., Brown,  
855 M., Liu, X.S., 2010. Nucleosome dynamics define transcriptional enhancers.  
Nat Genet 42, 343–7. doi:10.1038/ng.545.
- Hertz, G.Z., Hartzell, G.W., Stormo, G.D., 1990. Identification of consensus  
patterns in unaligned DNA sequences known to be functionally related. Bioin-  
formatics 6, 81–92. doi:10.1093/bioinformatics/6.2.81.
- 860 Hertz, G.Z., Stormo, G.D., 1999. Identifying DNA and protein patterns with  
statistically significant alignments of multiple sequences. Bioinformatics (Ox-  
ford, England) 15, 563–577.
- Hill, T.L., 1985. Cooperativity theory in biochemistry : steady-state and equi-  
librium systems. Springer-Verlag, New York.
- 865 Jaeger, J., Blagov, M., Kosman, D., Kozlov, K.N., Manu, Myasnikova, E.,  
Surkova, S., Vanario-Alonso, C.E., Samsonova, M., Sharp, D.H., Reinitz, J.,  
2004a. Dynamical analysis of regulatory interactions in the gap gene system  
of drosophila melanogaster. Genetics 167, 1721–37. doi:10.1534/genetics.  
104.027334.
- 870 Jaeger, J., Surkova, S., Blagov, M., Janssens, H., Kosman, D., Kozlov, K.N.,  
Manu, Myasnikova, E., Vanario-Alonso, C.E., Samsonova, M., Sharp, D.H.,  
Reinitz, J., 2004b. Dynamic control of positional information in the early  
drosophila embryo. Nature 430, 368–71. doi:10.1038/nature02678.
- Keymer, J.E., Endres, R.G., Skoge, M., Meir, Y., Wingreen, N.S., 2006.  
875 Chemosensing in escherichia coli: two regimes of two-state receptors. Proc  
Natl Acad Sci U S A 103, 1786–91. doi:0507438103[pil]10.1073/pnas.  
0507438103.
- Kim, H., O’Shea, E., 2008. A quantitative model of transcription factor-  
activated gene expression. Nat Struct Mol Biol 15, 1192–1198.

- 880 Lam, F.H., Steger, D.J., O'Shea, E.K., 2008. Chromatin decouples promoter threshold from dynamic range. *Nature* 453, 246–50. doi:10.1038/nature06867.
- Lammers, N.C., Galstyan, V., Reimer, A., Medin, S.A., Wiggins, C.H., Garcia, H.G., 2019. Multimodal transcriptional control of pattern formation in embryonic development. *Proc Natl Acad Sci U S A* doi:10.1073/pnas.1912500117.
- 885 Levine, M., 2010. Transcriptional enhancers in animal development and evolution. doi:10.1016/j.cub.2010.06.070.
- Li, C., Cesbron, F., Oehler, M., Brunner, M., Hofer, T., 2018. Frequency modulation of transcriptional bursting enables sensitive and rapid gene regulation. *Cell Syst* 6, 409–423 e11. doi:10.1016/j.cels.2018.01.012.
- 890 Li, G.W., Burkhardt, D., Gross, C., Weissman, J.S., 2014a. Quantifying absolute protein synthesis rates reveals principles underlying allocation of cellular resources. *Cell* 157, 624–35. doi:10.1016/j.cell.2014.02.033.
- Li, X.Y., Eisen, M.B., 2018. Zelda potentiates transcription factor binding to zygotic enhancers by increasing local chromatin accessibility during early *Drosophila melanogaster* embryogenesis. *bioRxiv*, 380857doi:10.1101/380857.
- 895 Li, X.Y., Harrison, M.M., Villalta, J.E., Kaplan, T., Eisen, M.B., 2014b. Establishment of regions of genomic activity during the *Drosophila* maternal to zygotic transition. *Elife* 3. doi:10.7554/eLife.03737.
- 900 Li, X.Y., Thomas, S., Sabo, P.J., Eisen, M.B., Stamatoyannopoulos, J.A., Biggin, M.D., 2011. The role of chromatin accessibility in directing the widespread, overlapping patterns of *Drosophila* transcription factor binding. *Genome Biology* 12. doi:10.1186/gb-2011-12-4-r34.
- 905 Liang, H.L., Nien, C.Y., Liu, H.Y., Metzstein, M.M., Kirov, N., Rushlow, C., 2008. The zinc-finger protein zelda is a key activator of the early zygotic

genome in drosophila 456, 400–403. URL: <http://www.ncbi.nlm.nih.gov/pmc/articles/PMC2597674/>, doi:10.1038/nature07388.

Little, S.C., Tikhonov, M., Gregor, T., 2013. Precise developmental gene expres-  
910 sion arises from globally stochastic transcriptional activity. *Cell* 154, 789–800.  
doi:10.1016/j.cell.2013.07.025.

Liu, F., Morrison, A.H., Gregor, T., 2013. Dynamic interpretation of maternal  
inputs by the drosophila segmentation gene network. *Proc Natl Acad Sci U  
S A* 110, 6724–9. doi:10.1073/pnas.1220912110.

915 Lucas, T., Ferraro, T., Roelens, B., De Las Heras Chanes, J., Walczak, A.M.,  
Coppey, M., Dostatni, N., 2013. Live imaging of bicoid-dependent transcrip-  
tion in drosophila embryos. *Curr Biol* 23, 2135–9. doi:10.1016/j.cub.2013.  
08.053.

Margolis, J.S., Borowsky, M.L., Steingrimsson, E., Shim, C.W., Lengyel, J.A.,  
920 Posakony, J.W., 1995. Posterior stripe expression of hunchback is driven from  
two promoters by a common enhancer element. *Development* 121, 3067–77.

Martins, B.M., Swain, P.S., 2011. Trade-offs and constraints in allosteric sensing.  
*PLoS Comput Biol* 7, e1002261. doi:10.1371/journal.pcbi.1002261.

Marzen, S., Garcia, H.G., Phillips, R., 2013. Statistical mechanics of  
925 Monod-Wyman-Changeux (MWC) models. *Journal of Molecular Biology*  
425, 1433–1460. URL: <http://dx.doi.org/10.1016/j.jmb.2013.03.013>,  
doi:10.1016/j.jmb.2013.03.013.

Miller, J.A., Widom, J., 2003. Collaborative competition mechanism for gene  
activation in vivo. *Mol Cell Biol* 23, 1623–32.

930 Mir, M., Stadler, M.R., Ortiz, S.A., Hannon, C.E., Harrison, M.M., Darzacq,  
X., Eisen, M.B., 2018. Dynamic multifactor hubs interact transiently with  
sites of active transcription in drosophila embryos. *Elife* 7. doi:10.7554/  
eLife.40497.

- Mirny, L.A., 2010. Nucleosome-mediated cooperativity between transcription  
935 factors. *Proc Natl Acad Sci U S A* 107, 22534–9. doi:0913805107[pii]10.1073/pnas.0913805107.
- Monod, J., Wyman, J., Changeux, J.P., 1965. On the nature of allosteric transitions: A plausible model. *J Mol Biol* 12, 88–118.
- Narula, J., Igoshin, O.A., 2010. Thermodynamic models of combinatorial gene  
940 regulation by distant enhancers. *IET Syst Biol* 4, 393. doi:10.1049/iet-syb.2010.0010.
- Nien, C.Y., Liang, H.L., Butcher, S., Sun, Y., Fu, S., Gocha, T., Kirov, N., Manak, J.R., Rushlow, C., 2011. Temporal coordination of gene networks by Zelda in the early *Drosophila* embryo. *PLoS Genetics* 7. doi:10.1371/journal.pgen.1002339.  
945
- Park, J., Estrada, J., Johnson, G., Vincent, B.J., Ricci-Tam, C., Bragdon, M.D., Shulgina, Y., Cha, A., Wunderlich, Z., Gunawardena, J., DePace, A.H., 2019. Dissecting the sharp response of a canonical developmental enhancer reveals multiple sources of cooperativity. *Elife* 8. doi:10.7554/eLife.41266.
- 950 Parker, D.S., White, M.A., Ramos, A.I., Cohen, B.A., Barolo, S., 2011. The cis-regulatory logic of hedgehog gradient responses: key roles for gli binding affinity, competition, and cooperativity. *Sci Signal* 4, ra38. doi:10.1126/scisignal.2002077.
- Parsons, G.G., Tg, A.C., 1997. Mitotic Repression of RNA Polymerase II Transcription Is Accompanied by Release of Transcription Elongation Complexes  
955 17, 5791–5802.
- Perry, M.W., Bothma, J.P., Luu, R.D., Levine, M., 2012. Precision of hunchback expression in the *drosophila* embryo. *Curr Biol* 22, 2247–52. doi:10.1016/j.cub.2012.09.051.
- 960 Phillips, R., Belliveau, N.M., Chure, G., Garcia, H.G., Razo-Mejia, M., Scholes, C., 2019. Figure 1 theory meets figure 2 experiments in the

study of gene expression. *Annu Rev Biophys* 48, 121–163. doi:10.1146/annurev-biophys-052118-115525.

Phillips, R., Kondev, J., Theriot, J., Garcia, H.G., 2013. *Physical Biology of the Cell*, 2nd Edition. Garland Science, New York.

Polach, K.J., Widom, J., 1995. Mechanism of protein access to specific DNA sequences in chromatin: A dynamic equilibrium model for gene regulation. *J Mol Biol* 254, 130–49.

Rapp, O., Yifrach, O., 2017. Using the mwc model to describe heterotropic interactions in hemoglobin. *PLoS One* 12, e0182871. doi:10.1371/journal.pone.0182871.

Rapp, O., Yifrach, O., 2019. Evolutionary and functional insights into the mechanism underlying body-size-related adaptation of mammalian hemoglobin. *Elife* 8. doi:10.7554/eLife.47640.

Raveh-Sadka, T., Levo, M., Segal, E., 2009. Incorporating nucleosomes into thermodynamic models of transcription regulation. *Genome Res* 19, 1480–1496.

Razo-Mejia, M., Barnes, S.L., Belliveau, N.M., Chure, G., Einav, T., Lewis, M., Phillips, R., 2018. Tuning transcriptional regulation through signaling: A predictive theory of allosteric induction. *Cell Syst* 6, 456–469 e10. doi:10.1016/j.cels.2018.02.004.

Samee, M.A., Lim, B., Samper, N., Lu, H., Rushlow, C.A., Jimenez, G., Shvartsman, S.Y., Sinha, S., 2015. A systematic ensemble approach to thermodynamic modeling of gene expression from sequence data. *Cell Syst* 1, 396–407. doi:10.1016/j.cels.2015.12.002.

Sayal, R., Dresch, J.M., Pushel, I., Taylor, B.R., Arnosti, D.N., 2016. Quantitative perturbation-based analysis of gene expression predicts enhancer activity in early drosophila embryo. *Elife* 5. doi:10.7554/eLife.08445.



- Scholes, C., DePace, A.H., Sanchez, A., 2017. Combinatorial gene regulation  
990 through kinetic control of the transcription cycle. *Cell Syst* 4, 97–108 e9.  
doi:10.1016/j.cels.2016.11.012.
- Schulze, S.R., Wallrath, L.L., 2007. Gene Regulation by Chromatin Structure: Paradigms Established in *Drosophila melanogaster*. *Annual Review of Entomology* 52, 171–192. doi:10.1146/annurev.ento.51.110104.151007.
- 995 Segal, E., Fondufe-Mittendorf, Y., Chen, L., Thastrom, A., Field, Y., Moore, I.K., Wang, J.P., Widom, J., 2006. A genomic code for nucleosome positioning. *Nature* 442, 772–8.
- Segal, E., Raveh-Sadka, T., Schroeder, M., Unnerstall, U., Gaul, U., 2008. Predicting expression patterns from regulatory sequence in *drosophila* segmentation. *Nature* 451, 535–40. doi:nature06496[pii]10.1038/nature06496.  
1000
- Segel, L.A., Slemrod, M., 1989. The quasi-steady-state assumption: a case study in perturbation. *SIAM Review* 31, 446–477.
- Sepulveda, L.A., Xu, H., Zhang, J., Wang, M., Golding, I., 2016. Measurement of gene regulation in individual cells reveals rapid switching between promoter  
1005 states. *Science* 351, 1218–22. doi:10.1126/science.aad0635.
- Sharon, E., Kalma, Y., Sharp, A., Raveh-Sadka, T., Levo, M., Zeevi, D., Keren, L., Yakhini, Z., Weinberger, A., Segal, E., 2012. Inferring gene regulatory logic from high-throughput measurements of thousands of systematically designed promoters. *Nat Biotechnol* 30, 521–30. doi:10.1038/nbt.2205.
- 1010 Sherman, M.S., Cohen, B.A., 2012. Thermodynamic State Ensemble Models of cis-Regulation. *PLOS Computational Biology* 8, 1–10. URL: <https://doi.org/10.1371/journal.pcbi.1002407>, doi:10.1371/journal.pcbi.1002407.
- Shermoen, A.W., O’Farrell, P.H., 1991. Progression of the cell cycle through  
1015 mitosis leads to abortion of nascent transcripts. *Cell* 67, 303–10.

- 1020 Staudt, N., Fellert, S., Chung, H.R., Jäckle, H., Vorbrüggen, G.,  
2006. Mutations of the Drosophila zinc finger-encoding gene  
vielfältig impair mitotic cell divisions and cause improper chro-  
mosome segregation. *Molecular biology of the cell* 17, 2356–  
65. URL: <http://www.ncbi.nlm.nih.gov/pubmed/16525017>  
<http://www.pubmedcentral.nih.gov/articlerender.fcgi?artid=PMC1446075>,  
doi:10.1091/mbc.e05-11-1056.
- 1025 Struhl, G., Struhl, K., Macdonald, P.M., 1989. The gradient morphogen bi-  
coid is a concentration-dependent transcriptional activator. *Cell* 57, 1259–73.  
doi:0092-8674(89)90062-7[pii].
- Swem, L.R., Swem, D.L., Wingreen, N.S., Bassler, B.L., 2008. Deducing recep-  
tor signaling parameters from in vivo analysis: Luxn/ai-1 quorum sensing in  
vibrio harveyi. *Cell* 134, 461–73. doi:10.1016/j.cell.2008.06.023.
- 1030 Tu, Y., 2008. The nonequilibrium mechanism for ultrasensitivity in a biological  
switch: sensing by maxwell’s demons. *Proc Natl Acad Sci U S A* 105, 11737–  
41. doi:10.1073/pnas.0804641105.
- Vilar, J.M., Leibler, S., 2003. Dna looping and physical constraints on tran-  
scription regulation. *J Mol Biol* 331, 981–9.
- 1035 Wang, F., Shi, H., He, R., Wang, R., Zhang, R., Yuan, J., 2017. Non-equilibrium  
effect in the allosteric regulation of the bacterial flagellar switch. *Nature*  
*Physics* 13, 710–714. doi:10.1038/nphys4081.
- White, M.A., Parker, D.S., Barolo, S., Cohen, B.A., 2012. A model of spatially  
restricted transcription in opposing gradients of activators and repressors.  
*Mol Syst Biol* 8, 614. doi:10.1038/msb.2012.48.
- 1040 Xu, H., Sepulveda, L.A., Figard, L., Sokac, A.M., Golding, I., 2015. Combining  
protein and mrna quantification to decipher transcriptional regulation. *Nat*  
*Methods* 12, 739–42. doi:10.1038/nmeth.3446.

- Xu, Z., Chen, H., Ling, J., Yu, D., Struffi, P., Small, S., 2014. Impacts of the ubiquitous factor zelda on bicoid-dependent dna binding and transcription in  
1045 drosophila. *Genes Dev* 28, 608–21. doi:10.1101/gad.234534.113.
- Yamada, S., Whitney, P.H., Huang, S.K., Eck, E.C., Garcia, H.G., Rushlow, C.A., 2019. The drosophila pioneer factor zelda modulates the nuclear microenvironment of a dorsal target enhancer to potentiate transcriptional output. *Curr Biol* 29, 1387–1393 e5. doi:10.1016/j.cub.2019.03.019.
- 1050 Zeigler, R.D., Cohen, B.A., 2014. Discrimination between thermodynamic models of cis-regulation using transcription factor occupancy data. *Nucleic Acids Res* 42, 2224–34. doi:10.1093/nar/gkt1230.
- Zeng, L., Skinner, S.O., Zong, C., Sippy, J., Feiss, M., Golding, I., 2010. Decision making at a subcellular level determines the outcome of bacteriophage  
1055 infection. *Cell* 141, 682–91. doi:10.1016/j.cell.2010.03.034.
- Zinzen, R.P., Senger, K., Levine, M., Papatsenko, D., 2006. Computational models for neurogenic gene expression in the drosophila embryo. *Curr Biol* 16, 1358–65. doi:10.1016/j.cub.2006.05.044.
- Zoller, B., Little, S.C., Gregor, T., 2018. Diverse spatial expression patterns  
1060 emerge from unified kinetics of transcriptional bursting. *Cell* 175, 835–847 e25. doi:10.1016/j.cell.2018.09.056.

# Supplementary Information

## S1. Equilibrium Models of Transcription

### S1.1. An overview of equilibrium thermodynamics models of transcription

1065 In this section we give a brief overview of the theoretical concepts behind equilibrium thermodynamics models of transcription. For a more detailed overview, we refer the reader to Bintu et al. (2005b) and Bintu et al. (2005a). These models invoke statistical mechanics in order to calculate bulk properties of a system by enumerating the probability of each possible microstate of  
1070 the system. The probability of a given microstate is proportional to its Boltzmann weight  $e^{-\beta\varepsilon}$ , where  $\varepsilon$  is the energy of the microstate and  $\beta = (k_B T)^{-1}$  with  $k_B$  being the Boltzmann constant and  $T$  the absolute temperature of the system (Garcia et al., 2007).

Specific examples of these microstates in the context of simple activation are featured in Fig. S1. As reviewed in Garcia et al. (2007), the Boltzmann weight of each of these microstates can also be written in a thermodynamic language that accounts for the concentration of the molecular species, their dissociation constant to DNA, and a cooperativity term  $\omega$  that accounts for the protein-protein interactions between the activator and RNAP. To calculate the probability of finding RNAP bound to the promoter  $p_{bound}$ , we divide the sum of the weights of the RNAP-bound states by the sum of all possible states

$$p_{bound} = \frac{\frac{[P]}{K_p} + \omega \frac{[P][A]}{K_p K_a}}{1 + \frac{[P]}{K_p} + \frac{[A]}{K_a} + \omega \frac{[P][A]}{K_p K_a}}. \quad (S1)$$

Here,  $[P]$  and  $[A]$  are the concentrations of RNAP and activator, respectively.  
1075  $K_p$  and  $K_a$  are their corresponding dissociation constants, and  $\omega$  indicates an interaction between activator and RNAP:  $\omega > 1$  corresponds to cooperativity, whereas  $0 < \omega < 1$  corresponds to anti-cooperativity.

Using  $p_{bound}$ , we write the subsequent rate of mRNA production by assuming the *occupancy hypothesis*, which states that

$$\frac{dmRNA}{dt} = R p_{bound}, \quad (S2)$$

| STATE                                                                             | WEIGHT                                   | RATE |
|-----------------------------------------------------------------------------------|------------------------------------------|------|
| 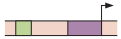 | 1                                        | 0    |
|  | $\frac{[P]}{K_p}$                        | $R$  |
|  | $\frac{[A]}{K_a}$                        | 0    |
|  | $\omega \frac{[P]}{K_p} \frac{[A]}{K_a}$ | $R$  |

Figure S1: Equilibrium thermodynamic model of simple activation. A promoter region with one binding site for an activator molecule has four possible microstates, each with its corresponding statistical weight and rate of RNAP loading.

where  $R$  is an underlying rate of transcriptional initiation (usually interpreted as the rate of loading RNAP from the promoter-bound state). In the case of simple activation illustrated in Fig. S1, the overall transcriptional initiation rate is then given by

$$\frac{dmRNA}{dt} = R \frac{\frac{[P]}{K_p} + \omega \frac{[P]}{K_p} \frac{[A]}{K_a}}{1 + \frac{[P]}{K_p} + \frac{[A]}{K_a} + \omega \frac{[P]}{K_p} \frac{[A]}{K_a}}. \quad (\text{S3})$$

From Eq. S1, one can derive the Hill equation that is frequently used to model biophysical binding. In the limit of high cooperativity,  $\omega \frac{[P]}{K_p} \gg 1$  and  $\omega \frac{[A]}{K_a} \gg 1$  such that

$$p_{bound} = \frac{\omega \frac{[P]}{K_p} \frac{[A]}{K_a}}{1 + \omega \frac{[P]}{K_p} \frac{[A]}{K_a}}. \quad (\text{S4})$$

If we then define a new binding constant  $K'_a = \frac{K_a K_p}{\omega [P]}$ , we get the familiar Hill equation of order 1 with a binding constant  $K'_a$

$$p_{bound} = \frac{\frac{[A]}{K'_a}}{1 + \frac{[A]}{K'_a}} \quad (\text{S5})$$

In general, any Hill equation of order  $n$  can be derived from a more fundamental equilibrium thermodynamic model of simple activation possessing  $n$  activator binding sites in the appropriate limits of high cooperativity. Thus, any time a Hill equation is invoked, equilibrium thermodynamics is implicitly used, bringing with it all of the underlying assumptions described in Section S6.4. This

highlights the importance of rigorously grounding the assumptions made in any model of transcription, to better discriminate between the effects of equilibrium and non-equilibrium processes.

### *S1.2. Thermodynamic MWC model*

In the thermodynamic MWC model, we consider a system with six Bicoid binding sites and ten Zelda binding sites. In addition, we allow for RNAP binding to the promoter.

In our model, the DNA can be in either an accessible or an inaccessible state. The difference in free energy between the two states is given by  $-\Delta\varepsilon_{\text{chrom}}$ , where  $\Delta\varepsilon_{\text{chrom}}$  is defined as

$$\Delta\varepsilon_{\text{chrom}} = \varepsilon_{\text{accessible}} - \varepsilon_{\text{inaccessible}}. \quad (\text{S6})$$

Here,  $\varepsilon_{\text{accessible}}$  and  $\varepsilon_{\text{inaccessible}}$  are the energies of the accessible and inaccessible states, respectively. A positive  $\Delta\varepsilon_{\text{chrom}}$  signifies that the inaccessible state is at a lower energy level, and therefore more probable, than the accessible state. We assume that all binding sites for a given molecular species have the same binding affinity, and that all accessible states exist at the same energy level compared to the inaccessible state. Thus, the total number of states is determined by the combinations of occupancy states of the three types of binding sites as well as the presence of the inaccessible, unbound state. We choose to not allow any transcription factor or RNAP binding when the DNA is inaccessible.

In this equilibrium model, the statistical weight of each accessible microstate is given by the thermodynamic dissociation constants  $K_b$ ,  $K_z$ , and  $K_p$  of Bicoid, Zelda, and RNAP respectively. The statistical weight for the inaccessible state is  $e^{\Delta\varepsilon_{\text{chrom}}}$ . We allow for a protein-protein interaction term  $\omega_b$  between nearest-neighbor Bicoid molecules, as well as a pairwise cooperativity  $\omega_{bp}$  between Bicoid and RNAP. However, we posit that Zelda does not interact directly with either Bicoid or RNAP. For notational convenience, we express the statistical weights in terms of the non-dimensionalized concentrations of Bicoid, Zelda, and RNAP, given by  $b$ ,  $z$  and  $p$ , respectively, such that, for example,  $b \equiv \frac{[\text{Bicoid}]}{K_b}$ . Fig. S2

| STATE | WEIGHT                                  | RATE |
|-------|-----------------------------------------|------|
|       | $e^{\beta\Delta\epsilon_{chrom}}$       | 0    |
|       | 1                                       | 0    |
|       | $b$                                     | 0    |
|       | $b^2 \omega_b$                          | 0    |
|       | $z$                                     | 0    |
|       | $z b$                                   | 0    |
| ...   |                                         |      |
|       | $z^{10} b^6 \omega_b^5$                 | $R$  |
|       | $p$                                     | $R$  |
|       | $b p \omega_{bp}$                       | $R$  |
|       | $b^2 \omega_b p \omega_{bp}^2$          | $R$  |
|       | $z p$                                   | $R$  |
|       | $z b p \omega_{bp}$                     | $R$  |
| ...   |                                         |      |
|       | $z^{10} b^6 \omega_b^5 p \omega_{bp}^6$ | $R$  |

Figure S2: States, weights, and rate of RNAP loading diagram for the thermodynamic MWC model, containing six Bicoid binding sites, ten Zelda binding sites, and a promoter.

shows the states and statistical weights for this thermodynamic MWC model, with all the associated parameters.

Incorporating all the microstates, we can calculate a statistical mechanical partition function, the sum of all possible weights, which is given by

$$Z = e^{\Delta\epsilon_{chrom}/k_B T} + \underbrace{(1+z)^{10}}_{\text{Zelda binding}} \underbrace{(1+b+b^2\omega_b+\dots+b^6\omega_b^5+p+pb\omega_{bp}+\dots+pb^6\omega_b^5\omega_{bp}^6)}_{\text{Bicoid and RNAP binding}}. \quad (\text{S7})$$

Using the binomial theorem

$$(a+b)^N = \sum_{n=0}^N \binom{N}{n} a^n b^{N-n},$$

Eq. S7 can be expressed more compactly as

$$Z = e^{\Delta\varepsilon_{chrom}/k_B T} + (1+z)^{10} \left( 1 + p + \sum_{j=0,1} \sum_{i=1}^6 \binom{6}{i} b^i \omega_b^{i-1} p^j \omega_{bp}^j \right). \quad (\text{S8})$$

From this partition function, we can calculate  $p_{bound}$ , the probability of being in an RNAP-bound state. This term is given by the sum of the statistical weights of the RNAP-bound states divided by the partition function

$$p_{bound} = \frac{1}{Z} \left( (1+z)^{10} p \left( 1 + \sum_{i=1}^6 \binom{6}{i} b^i \omega_b^{i-1} \omega_{bp}^i \right) \right). \quad (\text{S9})$$

In this model, we once again assume that the transcription associated with each microstate is zero unless RNAP is bound, in which case the associated rate is  $R$ . Then, the overall transcriptional initiation rate is given by the product of  $p_{bound}$  and  $R$

$$\frac{dmRNA}{dt} = R \frac{1}{Z} \left( (1+z)^{10} p \left( 1 + \sum_{i=1}^6 \binom{6}{i} b^i \omega_b^{i-1} \omega_{bp}^i \right) \right). \quad (\text{S10})$$

1110 Note that since the MS2 technology only measures nascent transcripts, we can ignore the effects of mRNA degradation and focus on transcriptional initiation.

### S1.3. Constraining model parameters

The transcription rate  $R$  of the RNAP-bound states can be experimentally constrained by making use of the fact that the *hunchback* minimal reporter used in this work produces a step-like pattern of transcription across the length of the fly embryo (Fig. 4C). Since in the anterior end of the embryo, the observed transcription appears to level out to a maximum value, we assume that Bicoid binding is saturated in this anterior end of the embryo such that

$$p_{bound}(b \rightarrow \infty) \approx 1. \quad (\text{S11})$$

In this limit, Eq. S10 can be written as

$$\frac{dmRNA}{dt} = R_{max} \approx R, \quad (\text{S12})$$

where  $R_{max}$  is the maximum possible transcription rate. Importantly,  $R_{max}$  is an experimentally observed quantity rather than a free parameter. As a result,



1115 the model parameter  $R$  is determined by experimentally measurable quantity  $R_{max}$ .

The value of  $p$  can also be constrained by measuring the transcription rate in the embryo's posterior, where we assume Bicoid concentration to be negligible. Here, the observed transcription bottoms out to a minimum level  $R_{min}$  (Fig. 4C), which we can connect with the model's theoretical minimum rate. Specifically, in this limit,  $b$  approaches zero in Eq. S10 such that all Bicoid-dependent terms drop out, resulting in

$$\frac{dmRNA}{dt} = R_{min} \approx \frac{1}{Z} \left( (1+z)^{10} p \right) R_{max}, \quad (S13)$$

where we have replaced  $R$  with  $R_{max}$  as described above. Next, we can express  $p$  in terms of the other parameters such that

$$p \approx \frac{R_{min} \left( e^{\Delta\varepsilon_{chrom}/k_B T} + (1+z)^{10} \right)}{\left( R_{max} - R_{min} \right) (1+z)^{10}}. \quad (S14)$$

Thus,  $p$  is no longer a free parameter, but is instead constrained by the experimentally observed maximum and minimum rates of transcription  $R_{max}$  and  $R_{min}$ , as well as our choices of  $K_z$  and  $\Delta\varepsilon_{chrom}$ . In our analysis,  $R_{max}$  and  $R_{min}$  are calculated by taking the mean RNAP loading rate across all embryos from the anterior and posterior of the embryo respectively, extrapolated using the trapezoidal fitting scheme described in Section S2.3.

1125 Finally, we expand this thermodynamic MWC model to also account for suppression of transcription in the beginning of the nuclear cycle via mechanisms such as mitotic repression (Section S3.1). To make this possible, we include a trigger time term  $t_{MitRep}$ , before which we posit that no readout of Bicoid or Zelda by *hunchback* is possible and the rate of RNAP loading is fixed at 0. For times  $t > t_{MitRep}$ , the system behaves according to Eq. S10. Thus, given the constraints stemming from direct measurements of  $R_{max}$  and  $R_{min}$ , the model   
 1130 has six free parameters:  $\Delta\varepsilon_{chrom}$ ,  $\omega_b$ ,  $\omega_{bp}$ ,  $K_b$ ,  $K_z$ , and  $t_{MitRep}$ . The final

calculated transcription rate is then integrated in time to produce a predicted MS2 fluorescence as a function of time (Section S2.2).

For subsequent parameter exploration of this model (Section S5.1), constraints were placed on the parameters to ensure sensible results. Each parameter was constrained to be strictly positive such that:

- $\Delta\varepsilon_{chrom} > 0$
- $K_b > 0$
- $K_z > 0$
- $\omega_b > 0$
- 1140 •  $\omega_{bp} > 0$
- $t_{MitRep} > 0$ .

## S2. Input-Output measurements, predictions, and characterization

### S2.1. Input measurement methodology

Input transcription-factor measurements were carried out separately in individual embryos containing a eGFP-Bicoid transgene in a *bicoid* null mutant  
1145 background (Gregor et al., 2007b) or a Zelda-sfGFP CRISPR-mediated homologous recombination at the endogenous *zelda* locus (Hamm et al., 2017). Over the course of nuclear cycle 13, the fluorescence inside each nucleus was extracted (details given in Section 4.5), resulting in a measurement of the nuclear concentration of each transcription factor over time. Six eGFP-Bicoid and three  
1150 Zelda-sfGFP embryos were imaged.

Representative fluorescence traces of eGFP-Bicoid for a single embryo indicate that the magnitude of eGFP-Bicoid fluorescence decreases for nuclei located toward the posterior of the embryo (Fig. S3A). Further, the nuclear fluorescence  
1155 of eGFP-Bicoid at 8 min into nuclear cycle 13 (Fig. S3B) exhibited the known exponential decay of Bicoid, with a mean decay length of  $23.5\% \pm 0.6\%$  of the

total embryo length, consistent with but slightly different than previous measurements that suggested a mean decay length of  $19.1\% \pm 0.8\%$  (Liu et al., 2013). This discrepancy could stem, for example, from minor differences in acquisition  
1160 from the laser-scanning two-photon microscope used in Liu et al. (2013) versus the laser-scanning confocal microscope used here, such as differences in axial resolution (due both to different choices of objectives and the inherent differences in axial resolution of one-photon and two-photon fluorescence excitation processes). Nevertheless, the difference was minute enough that we felt confident  
1165 in our eGFP-Bicoid measurements.

Intra-embryo variability in eGFP-Bicoid nuclear fluorescence, defined by the standard deviation across nuclei within a single embryo divided by the mean, was in the range of 10-30%, as was the inter-embryo variability, defined by the standard deviation of the mean amongst nuclei, across different embryos  
1170 (Fig. S3C, blue and black, respectively). Six separate eGFP-Bicoid embryos were measured.

Similarly, representative fluorescence time traces of Zelda-sfGFP for a single embryo are shown in Fig. S3D. Unlike the eGFP-Bicoid profile, the Zelda-sfGFP nuclear fluorescence was approximately uniform across embryo position  
1175 (Fig. S3E), consistent with previous fixed-tissue measurements (Staudt et al., 2006; Liang et al., 2008). Intra-embryo variability in Zelda-sfGFP nuclear fluorescence was very low (less than 10%), whereas inter-embryo variability was relatively higher, up to 20% (Fig. S3F, red and black, respectively). Three separate Zelda-sfGFP embryos were measured.

1180 Due to the consistency of Zelda-sfGFP nuclear fluorescence, we assumed the Zelda profile to be spatially uniform in our analysis, and thus created a mean Zelda-sfGFP measurement for each individual embryo by averaging all mean nuclear fluorescence traces in space across the anterior-posterior axis of the embryo (Fig. S3D, inset). This mean measurement was used as an input  
1185 in the theoretical models. However, we still retained inter-embryo variability in Zelda, as described below.

To combine multiple embryo datasets as inputs to the models explored

throughout this work, the fluorescence traces corresponding to each dataset were aligned at the start of nuclear cycle 13, defined as the start of anaphase. Because each embryo may have possessed slightly different nuclear cycle lengths and/or experimental sampling rates (due to the manual realignment of the z-stack to keep nuclei in focus), the individual datasets were not combined in order to create average Bicoid and Zelda profiles across embryos. Instead, a simulation and model prediction were performed for each combination of measured input Bicoid and Zelda datasets, essentially an *in silico* experiment covering a portion of the full embryo length. In all, outputs at each embryo position were predicted in at least three separate simulations. Subsequent analyses used the mean and standard error of the mean of these amalgamated simulations. With six GFP-Bicoid datasets and three Zelda-GFP datasets, there were 18 unique combinations of input embryo datasets; for a single set of parameters used in a particular model, each derived metric (e.g.  $t_{on}$ ) was calculated using predicted outputs from each of the 18 possible input combinations. This procedure provided full embryo coverage and resulted in a distribution of the derived metric for that particular set of parameters. From this distribution, the mean and standard error of the mean were calculated, leading to the error bars in plots such as Fig. S6.

### *S2.2. MS2 fluorescence simulation protocol*

To calculate a predicted MS2 fluorescence trace from measured Bicoid and Zelda inputs for a given theoretical model, we utilized a simple model of transcription initiation, elongation, and termination. First, the dynamic transcription-factor concentrations were used as inputs to each of the theoretical models outlined throughout the paper. These models generated a rate of RNAP loading as a function of time and space across the embryo over the course of nuclear cycle 13.

For each position along the anterior-posterior axis, the predicted rate of RNAP loading was integrated over time to generate a predicted MS2 fluorescence trace. Given the known reporter construct length  $L$  of 5.2 kb (Garcia

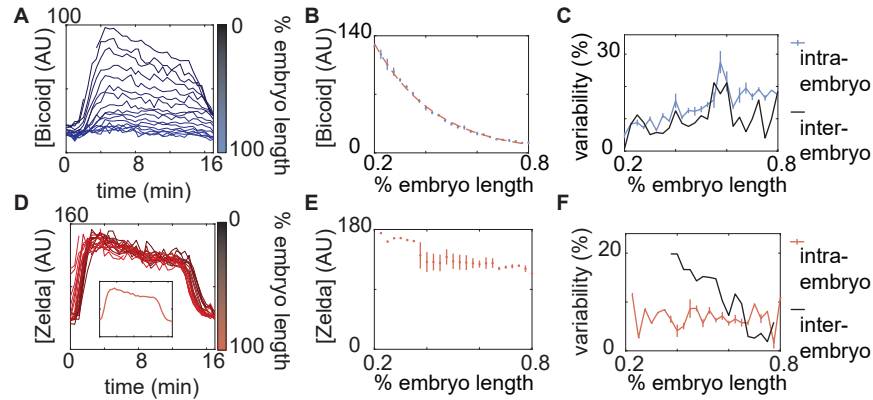

Figure S3: Measurements of input transcription-factor concentration dynamics . (A) Nuclear eGFP-Bicoid concentration as a function of time into nuclear cycle 13 across various positions along the anterior-posterior axis of a single embryo. (B) eGFP-Bicoid concentration at 8 min into nuclear cycle 13 as a function of position along the embryo averaged over all measured embryos ( $n=6$ ). The fit of the concentration profile to an exponential function results in a decay length of  $23\% \pm 0.6\%$  embryo length. (C) Intra- and inter-embryo variability in eGFP-Bicoid nuclear fluorescence along the anterior-posterior axis. (D) Zelda-sfGFP concentration as a function of time into nuclear cycle 13 across various anterior-posterior positions of a single embryo. (D, inset) Zelda-sfGFP concentration averaged over the data shown in D. (E) Zelda-sfGFP concentration at 8 min into nuclear cycle 13 as a function of position along the anterior-posterior axis of the embryo averaged over all measured embryos ( $n=3$ ). Note that anterior of 40% and posterior of 77.5% only a single embryo was measured; no error bars were calculated. (F) Intra- and inter-embryo variability in Zelda-sfGFP nuclear fluorescence along the anterior-posterior axis. (B,E, error bars represent standard error of the mean nuclear fluorescence, measured across embryos; C,F, error bars represent standard error of the mean intra-embryo variability, measured across embryos.)

et al., 2013), we assume that RNAP molecules are loaded onto the start of the gene at a rate  $R(t)$  predicted by the particular model under consideration (Fig. S4; see Sections S1.2, S6.1, S7.1, and S8.1 for model details). Each RNAP molecule traverses the gene at a constant velocity  $v$  of 1.54 kb/min, as measured experimentally by Garcia et al. (2013). With these numbers, we calculate an elongation time

$$t_{elon} = \frac{L}{v}. \quad (\text{S15})$$

1215 Finally, we assume that upon reaching the end of the reporter gene, the RNAP molecules terminate and disappear instantly such that they no longer contribute to spot fluorescence.

The MS2 fluorescence signal reports on the number of RNAP molecules actively occupying the gene at any given time and, under the assumptions outlined above, is given by the integral

$$F(t) = \alpha \int_0^t \left( R(t') - R(t' - t_{elon}) \right) dt', \quad (\text{S16})$$

1220 where  $F(t)$  is the predicted fluorescence value,  $R(t)$  is the RNAP loading rate predicted by each specific model,  $R(t - t_{elon})$  is the time-shifted loading rate that accounts for RNAP molecules finishing transcription at the end of the gene, and  $\alpha$  is an arbitrary scaling factor to convert from absolute numbers of RNAP molecules to arbitrary fluorescence units. The predicted value  $F(t)$  was scaled by  $\alpha$  to match the experimental data.

The final predicted MS2 signal was modified in a few additional ways. First, any RNAP molecule that had not yet reached the position of the MS2 stem loops had its fluorescence value set to zero (Fig. S4, i), since only RNAP molecules downstream of the MS2 stem loop sequence exhibit a fluorescent signal. Second, RNAP molecules that were only partially done elongating the MS2 stem loops contributed a partial fluorescence intensity, given by the ratio of the distance traversed through the stem loops to the total length of the stem loops

$$F_{partial} = \frac{L_{partial}}{L_{loops}},$$

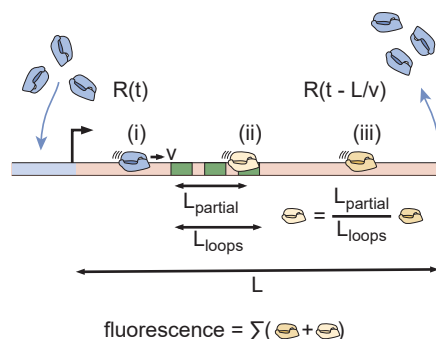

Figure S4: MS2 fluorescence calculation protocol. RNAP molecules load onto the reporter gene at a time-dependent rate  $R(t)$ , after which they elongate at a constant velocity  $v$ . Upon reaching the end of the gene after a length  $L$  has been transcribed, they are assumed to terminate and disappear instantly, given by the time-shifted rate  $R(t - \frac{L}{v})$ . The time-dependent MS2 fluorescence is calculated by summing the contributions of RNAP molecules that are located before, within, or after the MS2 stem loop sequence (i, ii, and iii, respectively).

where  $F_{partial}$  is the partial fluorescence contributed by an RNAP molecule  
 1225 within the stem loop sequence region,  $L_{partial}$  is the distance within the stem  
 loop sequence traversed, and  $L_{loops}$  is the length of the stem loop sequence  
 (Fig. S4, ii). For this reporter construct, the length of the stem loops was  
 approximately  $L_{loops} = 1.28 \text{ kb}$ . RNAP molecules that had finished transcribing  
 the MS2 stem loops contributed the full amount of fluorescence (Fig. S4, iii).  
 1230 Finally, to make this simulation compatible with the trapezoidal fitting scheme  
 in Section S2.3, we included a falling signal at the end of the nuclear cycle,  
 achieved by setting  $R(t) = 0$  after 17 min into the nuclear cycle and thus  
 preventing new transcription initiation events.

Given the predicted MS2 fluorescence trace, the rate of RNAP loading and  
 1235  $t_{on}$  were extracted with the fitting procedure used on the experimental data  
 (Section S2.3).

### S2.3. Extracting initial RNAP loading rate and transcriptional onset time

To extract the initial rate of RNAP loading and the transcriptional onset  
 time  $t_{on}$  used in the data analysis, we fit both the experimental and calculated

1240 MS2 signals to a constant loading rate model, the trapezoidal model (Garcia et al., 2013).

The trapezoidal model provides a heuristic fit of the main features of the MS2 signal by assuming that the RNAP loading rate is either zero or some constant value  $r$  (Fig. S5A). At time  $t_{on}$ , the loading rate switches from zero  
1245 to this constant value  $r$ , producing a linear rise in the MS2 signal. After the elongation time  $t_{elong}$ , the loading of new RNAP molecules onto the gene is balanced by the loss of RNAP molecules at the end of the gene, producing a plateau in the MS2 signal. Finally, at the end of the nuclear cycle, transcription ceases at  $t_{off}$  and the RNAP loading rate switches back to zero, producing the  
1250 falling edge of the MS2 signal and completing the trapezoidal shape. Because we only consider the initial dynamics of transcription in the nuclear cycle in this investigation, we do not explore the behavior of  $t_{off}$ .

Fig. S5B shows the results of fitting the mean MS2 fluorescence from a narrow window within a single embryo to the trapezoidal model (Section 2.3).  
1255 With this fit, we can extract the initial rate of RNAP loading (given by the initial slope) as well as  $t_{on}$  (given by the intercept of the fit onto the x-axis).

As a consistency check, the  $t_{on}$  values extrapolated from the trapezoidal fit of the data were compared with the experimental time points at which the first MS2 spots were observed for both the wild-type and *zelda*<sup>-</sup> mutant experiments (Fig. S5C). Due to the detection limit of the microscope, this latter  
1260 method reports on the time at which a few RNAP molecules have already begun transcribing the reporter gene, rather than a “true” transcriptional onset time. Using the first frame of spot detection yields similar trends to the trapezoidal fits, except that the measured first frame times are systematically larger  
1265 by 3-5 min. Additionally, utilizing the first frame of detection to measure  $t_{on}$  appears to be a noisier method, likely because the actual MS2 spots cannot be observed below a finite signal-detection limit, whereas the extrapolated  $t_{on}$  from the trapezoidal fit corresponds to a “true” onset time below the signal-detection limit.



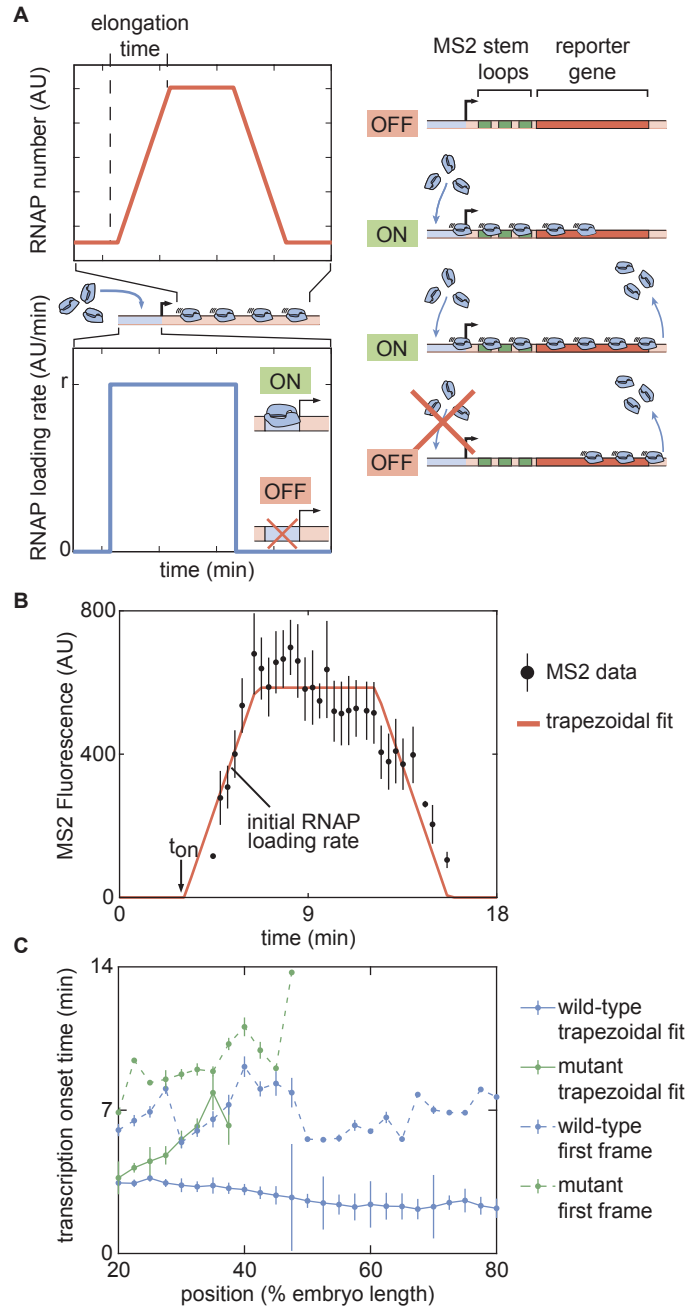

Figure S5: Outline of fitting to the trapezoidal model of transcription. (A) The trapezoidal model of transcription, where transcription begins at an onset time  $t_{on}$  and loads RNAP molecules with a constant rate  $r$ . (B) Results of fitting the MS2 fluorescence data from a single embryo to the trapezoidal model to extract  $t_{on}$  and the initial rate of RNAP loading. (C) Comparison of inferred  $t_{on}$  values between the trapezoidal model (solid lines) and using the time of first detection of signal in a fluorescence spot (dashed lines) for both wild-type and *zelda*<sup>-</sup> backgrounds. (B, error bars are standard error of the mean averaged over multiple nuclei within the embryo, for data in a wild-type background at 50% along the embryo length; C, error bars are standard error of the mean, averaged across embryos).

### 1270 **S3. Mitotic Repression**

#### *S3.1. Mitotic repression is necessary to recapitulate Bicoid- and Zelda-mediated regulation of hunchback using the thermodynamic MWC model*

As described in Section 2.3 of the main text, a mitotic repression window was incorporated into the thermodynamic MWC model (Section S1.2) in order to  
1275 explain the observed transcriptional onset times of *hunchback*. Here, we justify and explain this theoretical modification in greater detail.

Fig. S6A and B depicts the experimentally observed initial rates of RNAP loading and  $t_{on}$  across the length of the embryo (blue points) for the wild-type background. After constraining the maximum and minimum theoretically  
1280 allowed rates of RNAP loading (Section S1.3), we attempted to simultaneously fit the thermodynamic MWC model to both the rate of RNAP loading and  $t_{on}$ .

The fit results demonstrate that while the thermodynamic MWC model can recapitulate the measured step-like rate of RNAP loading at *hunchback* (Fig. S6A, purple line), it fails to predict the  $t_{on}$  throughout the embryo  
1285 (Fig. S6B, purple line; see Sections S2.2 and S2.3 for details about experimental and theoretical calculations). This model yields values of  $t_{on}$  that are much smaller than those experimentally observed, a trend that holds throughout the length of the embryo. This disagreement becomes more evident when comparing the output transcriptional activity reported by the measured MS2  
1290 fluorescence with the input concentrations of Bicoid and Zelda. Specifically, the Bicoid and Zelda concentration measurements at 45% along the embryo, shown for a single embryo in Fig. S6C, are used in conjunction with the previously mentioned best-fit model parameters to predict the output MS2 signal at the same position. This prediction can then be directly compared with experimental  
1295 data (Fig. S6D, purple line vs. black points, respectively). Whereas the model predicts that transcription will commence around 1 min after anaphase due to the concurrent increase in the Bicoid and Zelda concentrations, the observed MS2 signal begins to increase around 3 min after anaphase (Fig. S6D). As a result, the predicted transcriptional dynamics in Fig. S6D are systematically

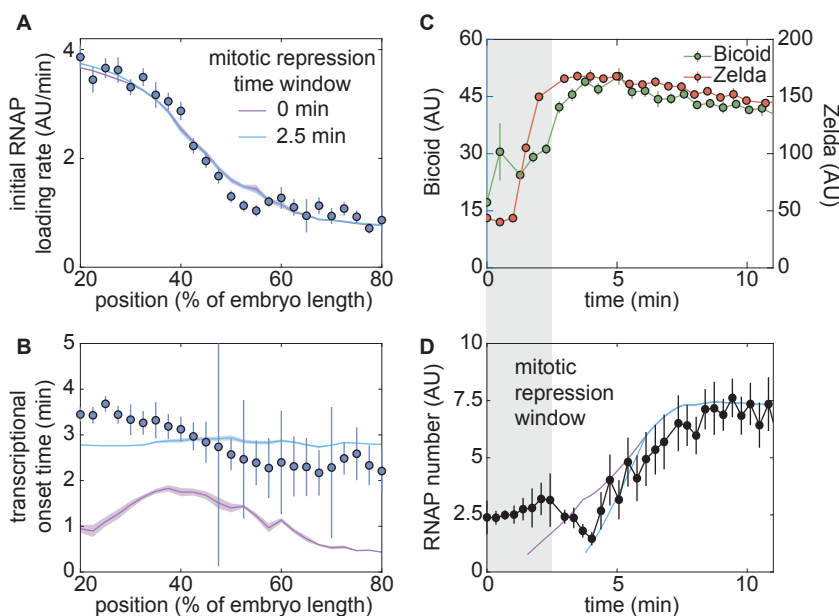

Figure S6: A thermodynamic MWC model including mitotic repression can recapitulate *hunchback* regulation by Bicoid and Zelda. (A) Measured initial rates of RNAP loading and (B)  $t_{on}$  (blue points) across the length of the embryo, compared to fits to the thermodynamic MWC model with and without accounting for mitotic repression (blue and purple curves, respectively). (C) Nuclear concentration dynamics of Bicoid and Zelda with proposed mitotic repression window (gray shading). (D) Predicted MS2 dynamics with no mitotic repression term or a 2.5 min mitotic repression window compared to experimental measurements. (A,B, solid lines indicate mean predictions of the model and shading represents standard error of the mean, while points indicate data and error bars represent the standard error of the mean, across 8 embryos; C, D, data from single embryos at 45% of the embryo length with error bars representing the standard error of the mean across nuclei, errors in model predictions in D were negligible and are obscured by the prediction curve; fitted parameter values for a 2.5 min mitotic repression window were  $\Delta\epsilon_{chrom} = 8.9 k_B T$ ,  $K_b = 152.3 AU$ ,  $K_z = 416.3 AU$ , with different arbitrary fluorescent units for Bicoid and Zelda,  $\omega_b = 6.4$ ,  $\omega_{bp} = 2.5$ , for a model assuming six Bicoid binding sites.)

1300 shifted in time with respect to the observed data.

The observed disagreement in  $t_{on}$  suggests that in this model, transcription is prevented from starting at the time dictated solely by the increase of Bicoid and Zelda concentrations. While we speculate that this effect could stem from processes such as RNAP escape from the promoter, DNA replication at the start  
1305 of the cell cycle, and post-mitotic nucleosome clearance from the promoter, we choose not to commit to a detailed molecular picture and instead ascribe this transcriptional refractory period at the beginning of the nuclear cycle to mitotic repression, the observation that the transcriptional machinery cannot operate during mitosis (Shermoen and O’Farrell, 1991; Gottesfeld and Forbes, 1997;  
1310 Parsons and Tg, 1997; Garcia et al., 2013). To account for this phenomenon, we revised our thermodynamic MWC model by stating that *hunchback* can only read out the inputs and begin transcription after a specified mitotic repression time window after the previous anaphase (Section S1.3).

Since we expect mitotic repression to operate independently of position along  
1315 the length of the embryo (Shermoen and O’Farrell, 1991), we assumed that the duration of mitotic repression was uniform throughout the embryo. After incorporating a uniform 2.5 min mitotic repression window into the thermodynamic MWC model (Fig. S6C and D, grey shaded region), the model successfully recapitulates  $t_{on}$  throughout the embryo (Fig. S6B and D, blue curves), while still  
1320 explaining the observed rates of RNAP loading (Fig. S6A, blue curve). Thus, once mitotic repression is accounted for, the thermodynamic MWC model based on statistical mechanics can quantitatively recapitulate the regulation of *hunchback* transcription by Bicoid and Zelda.

#### S4. *zelda*<sup>-</sup> mutant embryos

##### 1325 S4.1. The effect of the *zelda*<sup>-</sup> background on the Bicoid concentration profile

Our models rest on the assumption that the Bicoid gradient remains unaltered regardless of whether these measurements are made in the wild-type or *zelda*<sup>-</sup> backgrounds. To confirm this assumption, we measured eGFP-Bicoid

concentrations in a *zelda*<sup>-</sup> background. These flies were heterozygous for eGFP-  
1330 labeled Bicoid and for wild-type Bicoid, resulting in roughly 50% of total Bicoid  
being labeled with eGFP. As shown in Fig. S7, the resultant eGFP-Bicoid nu-  
clear fluorescence levels at 8 min into nuclear cycle 13 in the *zelda*<sup>-</sup> background  
(red) were roughly half the magnitude of the equivalent measurements in the  
wild-type background (blue). After doubling the heterozygote eGFP-Bicoid nu-  
1335 clear fluorescence measurements to rescale them (black), the two eGFP-Bicoid  
measurement curves were similar, although the *zelda*<sup>-</sup> eGFP-Bicoid values were  
systematically lower than in the wild-type background. The normalized dif-  
ference, defined as the absolute value of the difference between the wild-type  
and *zelda*<sup>-</sup> profiles at each position in the embryo divided by the value of the  
1340 wild-type profile at the position, averaged across all measured positions, was  
 $15.46\% \pm 1.64\%$ . This value is within the range of the inter-embryo variability  
of eGFP Bicoid in wild-type background embryos (Fig. S3C). Measuring the  
decay length of the eGFP-Bicoid profile in the *zelda*<sup>-</sup> background also yielded a  
slightly different result:  $20.8\% \pm 1.4\%$  of the total embryo length, as opposed  
1345 to  $23.5\% \pm 0.6\%$  in the wild-type background (dashed curves).

Nevertheless, these differences would have a negligible effect on our overall  
conclusions. In the context of our models, an overall rescaling in the magnitude  
of the Bicoid gradient between the wild-type and *zelda*<sup>-</sup> backgrounds can be  
compensated by a corresponding rescaling in the dissociation constant of Bicoid,  
1350  $K_b$ . Because our systematic exploration of theoretical models considers many  
possible parameter values (Section S5.1), this rescaling has no effect on our  
conclusion that the equilibrium models are insufficient to explain the *zelda*<sup>-</sup>  
data. As a result and given that our statistics for the wild-type eGFP-Bicoid  
data consisted of more embryos than the data for the *zelda*<sup>-</sup> background, we  
1355 used this wild-type data in our analyses as an input to both the wild-type and  
*zelda*<sup>-</sup> model calculations.

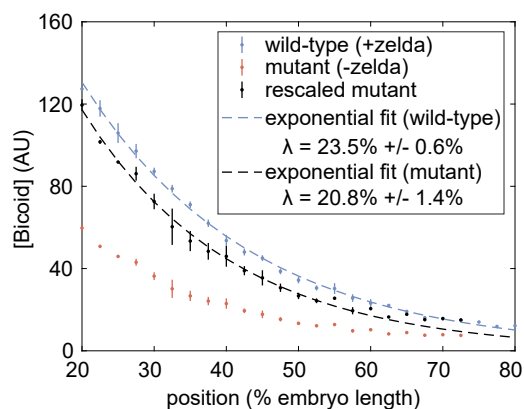

Figure S7: eGFP-Bicoid measurements in wild-type (blue) and *zelda*<sup>-</sup> mutant embryos (red), along with rescaled mutant profiles (black). Fits to an exponentially decaying function yield decay lengths in each background (blue and black dashed curves). A total of n=3 embryos were measured. All error bars are standard error of mean across embryos.

## S5. State-space exploration of theoretical models

### S5.1. General methodology

To help visualize the limits of our models, we collapsed our observations onto a two-dimensional state space, following a method similar to that described  
1360 in Estrada et al. (2016). In this space, the x-axis is the average  $t_{on}$  delay. This magnitude was computed by integrating the  $t_{on}$  across 20% to 37.5% of the embryo length, corresponding to the range in which both wild-type and *zelda*<sup>-</sup> experiments exhibited transcription in at least 50% of observed nuclei  
1365 (Figs. S8A and 5A; Eq. 4). We first subtracted all values of  $t_{on}$  by the value at 20% of the embryo length, removing the “baseline” from the calculation of the integral. After computing the integral, the resulting value was then normalized by dividing by the distance along the embryo integrated over (see Section 2.3 for more detail).

1370 The y-axis in our state space exploration plane is given by the position along the embryo at which the rate of RNAP loading reaches its midpoint (Fig. S8B) when fitted to a Hill function of Hill-coefficient six, the number of known Bi-

coid binding sites on the *hunchback* P2 enhancer (Driever and Nusslein-Volhard, 1988a; Park et al., 2019). The maximum and minimum values of the RNAP loading rate are fixed to  $R_{max}$  and  $R_{min}$  (Section S1.3), motivated by the observation that the wild-type RNAP loading rates exhibit maximum and minimum plateaus at either end of the embryo (Fig. S6A). Note that due to the large space of possible model behaviors, many predicted rate profiles did not fit well to this Hill function (e.g. Fig. S8B). Instead, this process should be interpreted as a way to extract, for a particular model realization, the best-fit midpoint position of the observed wild-type RNAP loading rate profile. If a particular model is capable of recapitulating the experimental data, then the best-fit midpoint position under this protocol should agree with that of the data. Hereafter we refer to this quantity as the rate midpoint position.

Combined, the average  $t_{on}$  delay and the rate midpoint position provide a simplified description of our data as well as of our theoretical predictions. Each theoretical model inhabits a finite region in this two-dimensional state space, which we can calculate by systematically varying model parameters. Fig. S8A and B show an example of how the average  $t_{on}$  delay and the rate midpoint position are calculated using the wild-type background data presented in Fig. 4C and D (points) in the main text.

Due to the large number of parameters of each model explored, the corresponding state-space boundaries were generated by efficient sampling of the underlying high-dimensional parameter space (Fig. S8C). The methodology is similar to the one described in Estrada et al. (2016). Briefly, a set of 100 initial points was generated, each with a randomized set of initial parameters, the specifics of which depended on the model being tested (Fig. S8C, i). The state space was sectioned into 10 horizontal and vertical slices (Fig. S8C, ii). The most extremal points in each slice were found, resulting in two extremal anterior-posterior positions for the mid-point of the rate of RNAP loading and two extremal average  $t_{on}$  delay points (Fig. S8C, iii). For each of these points, a new set of five points was generated using random parameters within a small neighborhood of the seed points determined by the extremal points of the pre-

vious iteration (Fig. S8C, iv). These new points were plotted; some of these  
1405 points may be more extreme than the previous set of points. Steps ii-iv were  
iterated, resulting in a growing boundary over time (Fig. S8C, v). Constraints  
imposed by the data were used to filter unrealistic results. First, if the simulated  
 $t_{on}$  at the most anterior position (20% of the embryo length) was greater than  
5.5 min or less than 1.5 min, the point was filtered out. This removal was jus-  
1410 tified experimentally, since none of the observed transcriptional onset values in  
this position in either experiment lay outside of these bounds (Fig. 4D and G).  
Second, if the simulated rate midpoint position was smaller than 16% or larger  
than 100% of the embryo length, then this point was also excluded. This exclu-  
sion was also justified experimentally, since the rate midpoints values of both  
1415 experiments were within this interval (Fig. 4C and F). Points that fulfilled these  
constraints were retained for the next iteration of the algorithm. This process  
was repeated until the resulting space of points no longer grew appreciably, re-  
sulting in an estimate of the size and shape of the state space for each of the  
models presented in Sections S1.2, S6.1, S7.1, and S8.1.

1420 To determine whether the algorithm had indeed converged, the total area of  
each model's region in parameter space was tracked with each iteration number.  
If the algorithm worked well, then this area would approach some saturation  
value. Fig. S8D shows the area of the state space corresponding to each model  
(normalized by the final area at the final iteration number) as a function of the  
1425 iteration number. Each model converged to a finite value, indicating that the  
parameter space occupied by the models had been thoroughly explored.

### *S5.2. State space exploration with the thermodynamic MWC model*

Fig. S9A shows the resulting two-dimensional state space for the thermo-  
dynamic MWC model (green shading), as well as all of the theoretical models  
1430 considered here. We plotted the wild-type and *zelda*<sup>-</sup> data on the same state  
space. While the wild-type data are represented as a small ellipse of uncer-  
tainty, the *zelda*<sup>-</sup> data appear as a large region because we cannot accurately  
determine the midpoint of the rate of RNAP loading due to the lack of tran-



1435 scriptional activity past about 40% of the embryo length. This shaded region represents a conservative estimate of the possible location of the *zelda*<sup>-</sup> data in this state space. Any successful model must occupy a region that overlaps both the wild-type data point and the *zelda*<sup>-</sup> data region.

The state space corresponding to the thermodynamic MWC model fails to overlap with the *zelda*<sup>-</sup> data. To make the picture more intuitive, this two-  
1440 dimensional state space was projected onto the x-dimension, the average  $t_{on}$  delay. To do this projection, we reasoned that since both the wild-type and *zelda*<sup>-</sup> data only occupied midpoint values between 40% and 100%, we would only retain points in that range. The resulting subset of state space was collapsed onto the x-axis, resulting in the bars shown in Fig. S9B. Even in this  
1445 one-dimensional representation, the failure of the thermodynamic MWC model (Fig. S9B, green bar) is evident. This one-dimensional projection is the one presented in the main text.

## S6. Failures and assumptions of thermodynamic models of transcription

### 1450 S6.1. Generalized thermodynamic model

The generalized thermodynamic model is an extension of the thermodynamic MWC model presented in Section S1.2. For extra generality, we assume the presence of twelve Bicoid binding sites and one RNAP binding site, but do not include the action of Zelda since the objective was to attempt to recapitulate  
1455 the *zelda*<sup>-</sup> mutant experimental data. We still allow for an inaccessible DNA state.

In this generalized model, the weight of each microstate can be arbitrary, rather than determined by underlying biophysical parameters. Since  $p_{bound}$  only depends on whether RNAP is bound, there is no need to distinguish between  
1460 different microstates that have the same number of Bicoid molecules bound: the arbitrary coefficients allow separate microstates to effectively be combined together into the same weight. Thus, each microstate corresponds only to the

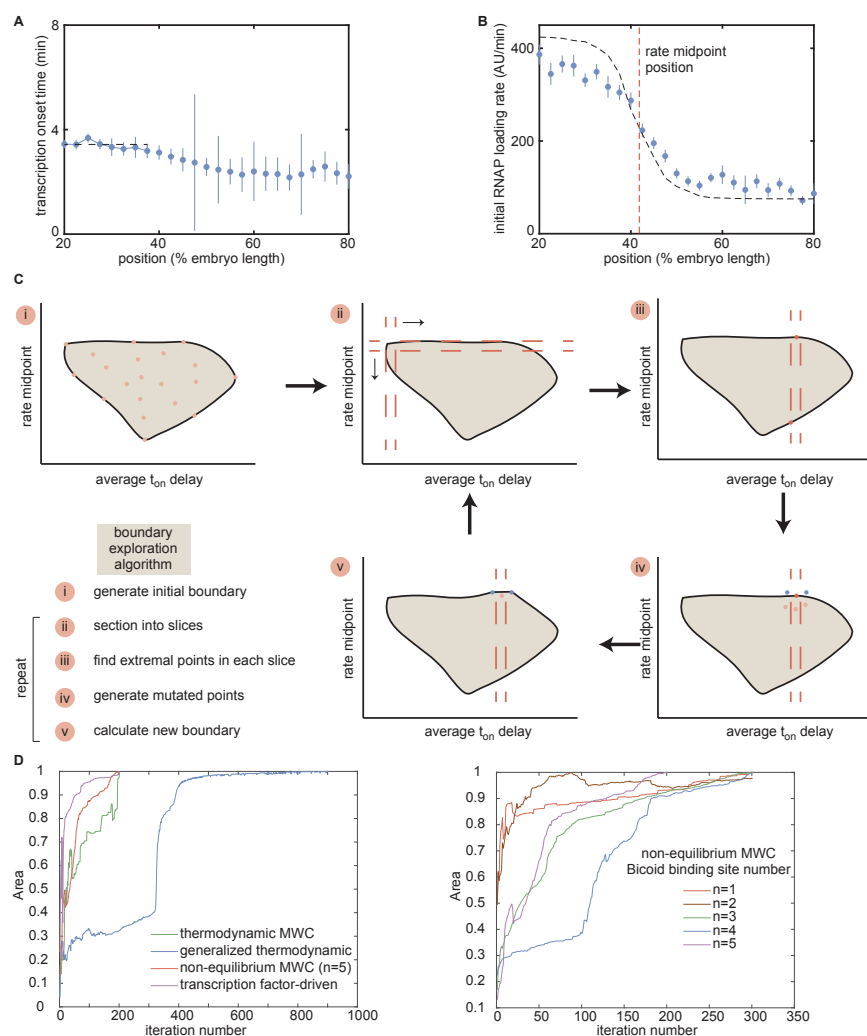

Figure S8: Description of state-space metrics and boundary-exploration algorithm. (A) Representative average  $t_{on}$  delay (black dashed line) for the wild-type background data in Fig. 4D, calculated by integrating the area under the curve from positions 20% to 37.5% along the embryo length and normalizing by dividing by the length over which the integral was taken. (B) Rate midpoint position for the wild-type background data in Fig. 4C, calculated by fitting a Hill equation of order 6 to the initial rates of RNAP loading. (C) Overview of the boundary-exploration algorithm. (i) A set of 100 points with random input parameters generates an initial state space of the investigated model. (ii) The space is sectioned into 10 horizontal and 10 vertical slices. (iii) The extremal points of each slice are found. (iv) For each extremal point, five new points are generated with input parameters in a small neighborhood around the parameters of this extremal point. (v) The new space is plotted with these new points, and steps (ii) - (iv) are repeated. (D) Normalized area of each investigated model's region in parameter space as a function of algorithm iteration number. All areas approach a steady value, indicating convergence.

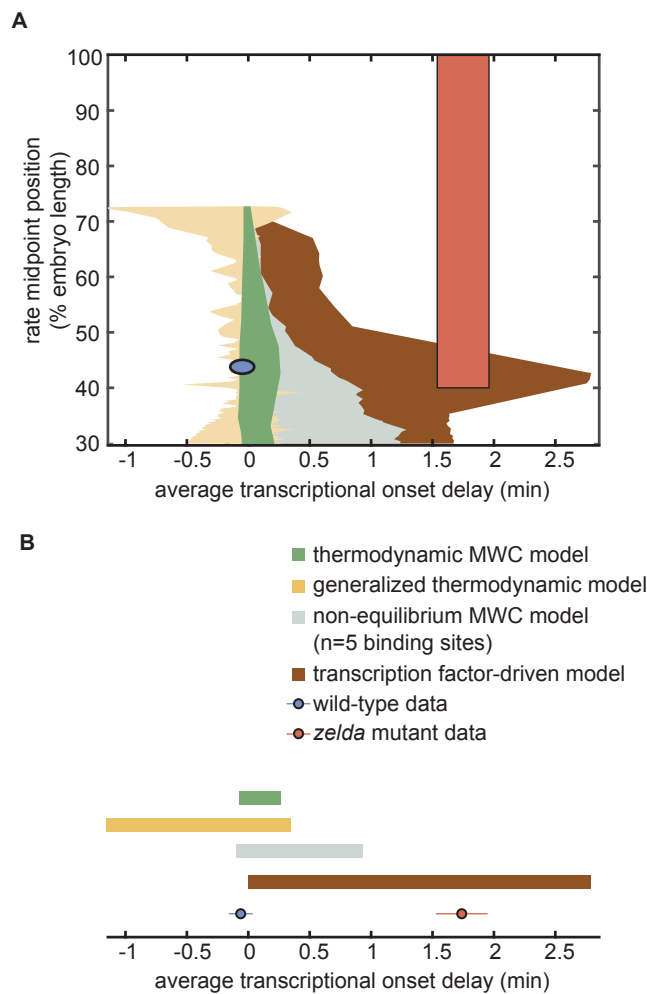

Figure S9: Exploration of state space. (A) Two-dimensional state-space exploration, showing the extents of state space of the wild-type (blue) and *zelda*<sup>-</sup> (red) data as well as of various models explored in the main text. (B) One-dimensional state-space exploration, created by projecting the two-dimensional state space in (A) for rate midpoint values between 40% and 100% onto the x-axis corresponding to the average  $t_{on}$  delay. Areas covered by the experimental data represent the standard error of the mean.

overall number of bound molecules, regardless of binding site ordering. With twelve Bicoid sites, in addition to the inaccessible state, there are 27 total microstates and 26 free parameters describing the weights of each state (with the accessible, unbound microstate normalized to unity). Like with the thermodynamic MWC model, we assume that transcription only occurs when RNAP is bound, with the same constrained maximum rate of RNAP loading  $R_{max}$ . However, since the weights of each microstate are arbitrary, we no longer have a variable  $p$  that can be constrained by  $R_{min}$  like in Eq. S14.

This generalized model is much more powerful than the thermodynamic MWC model due to a lack of coupling between individual microstate weights. Whereas in the previous model the underlying parameters  $K_b$  and  $\omega_b$  caused similar microstates to be related mathematically, now the statistical weights for each microstate are completely independent. Physically, this scenario can arise due to, for example, higher-order cooperativities or non-identical binding energies between binding sites (Estrada et al., 2016).

The partition function in this generalized thermodynamic model is given by the polynomial

$$Z = p_{inacc} + \sum_{r=0}^1 \sum_{n=0}^{12} P_{r,n} [Bicoid]^n, \quad (S17)$$

where  $p_{inacc}$  is the weight of the inaccessible state and  $P_{r,n}$  is the weight of the accessible state with  $r$  RNAP molecules bound and  $n$  Bicoid molecules bound. The overall transcriptional initiation rate is now

$$\frac{dmRNA}{dt} = \frac{1}{Z} \left( \sum_{n=0}^{12} P_{1,n} R [Bicoid]^n \right), \quad (S18)$$

where  $P_{1,n}$  is the statistical weight of each RNAP-bound state and  $R$  is the corresponding rate of transcriptional initiation. Note that, as described above,  $R$  is still equal to  $R_{max}$ , the constraint described in Section S1.3, but we no longer use the  $R_{min}$  constraint.

The resulting rate of transcriptional initiation is integrated over time to produce a simulated MS2 fluorescence trace using the same procedure as for the models presented in Sections S1.2, S7.1, and S8.1 (see Section S2.2 for details).

1485 As with the thermodynamic MWC model, we allow for a mitotic repression time  
window to account for the lack of transcription early in the nuclear cycle.

### *S6.2. Generalized thermodynamic model state space exploration*

Due to the high-dimensional parameter space of the generalized thermody-  
namic model, constraints were necessary to efficiently explore this parameter  
1490 space (Section S5.1). These constraints were placed on the values of the in-  
dividual microstate weights  $P_{r,n}$ , based on dimensional analysis and heuristic  
arguments. Specifically, each weight  $P_{r,n}$  is derived from a product of bind-  
ing constants  $K_d$  for either Bicoid or RNAP, pairwise cooperativity parameters  
 $\omega$ , and higher-order cooperativity terms. For the purposes of these parameter  
1495 constraints, we only consider the  $K_d$ s and  $\omega$ s, and ignore constraints on higher-  
order cooperativities. In principle, each Bicoid binding site possesses a unique  
 $K_d$  and protein-protein interaction terms  $\omega$  with other Bicoid molecules and/or  
with RNAP. However, as described below, these biophysical parameters, once  
non-dimensionalized, can be constrained to reasonable values by scaling rela-  
1500 tions through a simple bounding scheme.

For illustrative purposes, consider the microstate with RNAP and one Bicoid  
molecule bound. Its weight depends on two independent binding constants  $p, b$   
and a cooperativity term between RNAP and Bicoid  $\omega_{bp}$ . First, we assume that  
the  $p, b$  terms are non-dimensionalized, i.e. they take the form  $p = [RNAP]/K_p$   
and  $b = [Bicoid]/K_b$ . Although the two individual  $p, b$  terms are in principle  
different since RNAP and Bicoid have can different binding energies, we can be  
generous about the constraints and assume that the non-dimensionalized forms  
are both bounded below and above by 0 and 1000, respectively. This strategy  
is justified by assuming that neither RNAP nor Bicoid exist in concentrations  
three orders of magnitude above their dissociation constants, and do not exist  
at negative concentrations (Estrada et al., 2016). Similarly, we can be generous  
about any possible cooperativities and say that  $\omega_{bp}$  and  $\omega_b$  have a similar bound  
between 0 and 1000, thus accounting for both positive and negative coopera-  
tivities. For this state with RNAP and one Bicoid molecule bound, we can say

that

$$P_{1,1} = bp\omega_{bp} \quad (\text{S19})$$

which has bounds

$$0 < P_{1,1} < (1000)^2(1000) = 10^9 \quad (\text{S20})$$

and thus provide a bound for the possible values that the weight  $P_{1,1}$  can take.

In general, this process can be applied to enforce bounds on any microstate weight  $P_{r,n}$  through constraining the possible values of  $p$ ,  $b$ ,  $\omega_{bp}$ , and  $\omega_b$ . As a result, the weight of a microstate with more Bicoid bound (i.e. higher values of  $n$ ) will have a more generous dynamic range, due to the larger powers of  $b$  and  $\omega_b$ . In this way, exploration of parameter space can be made more constrained by restricting the possible values of the microstate weights  $P_{r,n}$ .

The generalized thermodynamic model of transcription encompasses a larger area of the explored state space than the thermodynamic MWC model (Fig. S9A). However, as evident by the projection onto the x-axis, this model fails to capture the delays observed in *zelda*<sup>-</sup> data (Fig. S9B, yellow rectangle).

### S6.3. Investigation of the failure of thermodynamic models

Here, we provide an intuitive explanation for why equilibrium thermodynamic models fail to recapitulate the delay in  $t_{on}$  for *zelda*<sup>-</sup> embryos. The combination of the occupancy hypothesis and the assumption of separation of times scales described in Section S6.4 imply that the rate of transcriptional initiation at any moment in time is an *instantaneous* readout of the Bicoid concentration at that time point. Thus, any thermodynamic model is *memoryless*. Intuitively, this means that a thermodynamic model requires transcription to begin as soon as the Bicoid concentration crosses a certain “threshold” since time delays between input and output require some sense of memory. Examination of the dynamic measurements of MS2 output in *zelda*<sup>-</sup> embryos reveals that no matter what “threshold” concentration of Bicoid is assigned for the start of transcription, the model cannot simultaneously describe two values of  $t_{on}$  corresponding to different positions along the anterior-posterior axis (Fig. S10A and B).

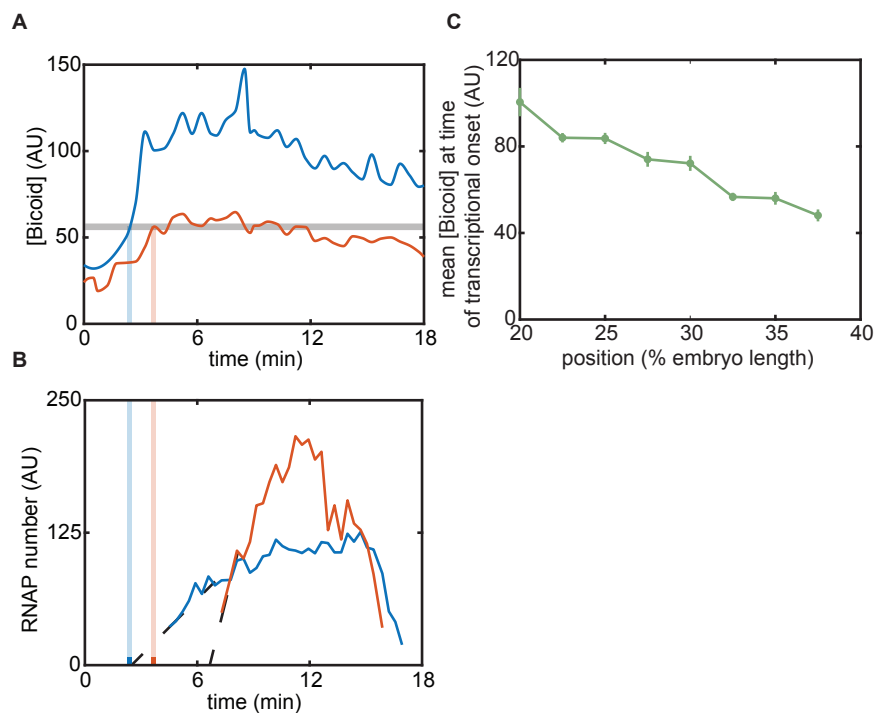

Figure S10: Intuition for failure of equilibrium models. (A) Mean Bicoid concentrations for two positions along the embryo (blue, red), with a “threshold” chosen to attempt to match the corresponding  $t_{on}$  in (B). (B) MS2 fluorescence signal for the two positions shown in (A) for the  $zelda^-$  experiment. Note that no single threshold value of Bicoid can match the timings in (A) with the transcriptional onset times in (B). (C) Mean Bicoid concentration at  $t_{on}$  as a function of position for the  $zelda^-$  data.

Another self-consistency check of a thermodynamic model is to examine the concentration of Bicoid at  $t_{on}$  for various positions along the embryo. Due to the memoryless nature of thermal equilibrium, a valid thermodynamic model predicts that, at different positions along the embryo,  $t_{on}$  will occur when Bicoid reaches the same threshold value. For the  $zelda^-$  data, however, the level of Bicoid at each anterior-posterior position's  $t_{on}$  value actually *decreases* with increasing  $t_{on}$ , suggesting the failure of the thermodynamic model (Fig. S10C). Thus, the strong position-dependent delay in  $t_{on}$  for the  $zelda^-$  data cannot be explained by an instantaneous Bicoid readout mechanism.

#### S6.4. Re-examining thermodynamic models of transcriptional regulation

Thermodynamic models based on equilibrium statistical mechanics can be seen as limiting cases of more general kinetic models. For example, consider simple activation, where an activator whose concentration is modulated in time  
1540 regulates transcription by binding to a single site (Fig. S11). In this generic model, the presence of activator can modulate the rates of activator and RNAP binding and unbinding through the parameters  $\alpha$ ,  $\beta$ ,  $\gamma$ , and  $\delta$ .

In order to reduce kinetic models to thermodynamic models where the probabilities of each state are dictated by Boltzmann weights such as those in Fig. 2, four conditions must be fulfilled. First, the rate of mRNA production must be linearly related to the probability of finding RNAP bound to the promoter (Fig. S11i). This *occupancy hypothesis* is necessary for Eq. S2 to hold. Second, the time scales of binding and unbinding of RNAP and transcription factors must be much faster than the time scales of the concentration dynamics of these proteins (Fig. S11ii). Third, these time scales must also be much faster than the rate of transcriptional initiation and mRNA production (Fig. S11iii). Under these conditions of *separation of time scales*, the binding and unbinding of proteins quickly reaches steady state while the overall concentrations of these molecular players are modulated (Segel and Slemrod, 1989). Fourth, there must be no energy input into the system (Fig. S11iv). This condition demands “detailed balance” (Vilar and Leibler, 2003; Ahsendorf et al., 2014; Hill, 1985): the product of state transition rates in the clockwise direction over a closed loop is equal to the product going in the counterclockwise direction, a constraint known as the *cycle condition* (Estrada et al., 2016). In the case of Fig. S11, this requirement implies that

$$k_P^{ON} \delta k_A^{ON} \beta k_P^{OFF} k_A^{OFF} = k_P^{OFF} k_A^{ON} \alpha k_P^{ON} \gamma k_A^{OFF}. \quad (\text{S21})$$

If these four conditions are met, then the system is effectively in equilibrium and the various binding states adopt probabilities that can be calculated using  
1545 equilibrium statistical mechanics.



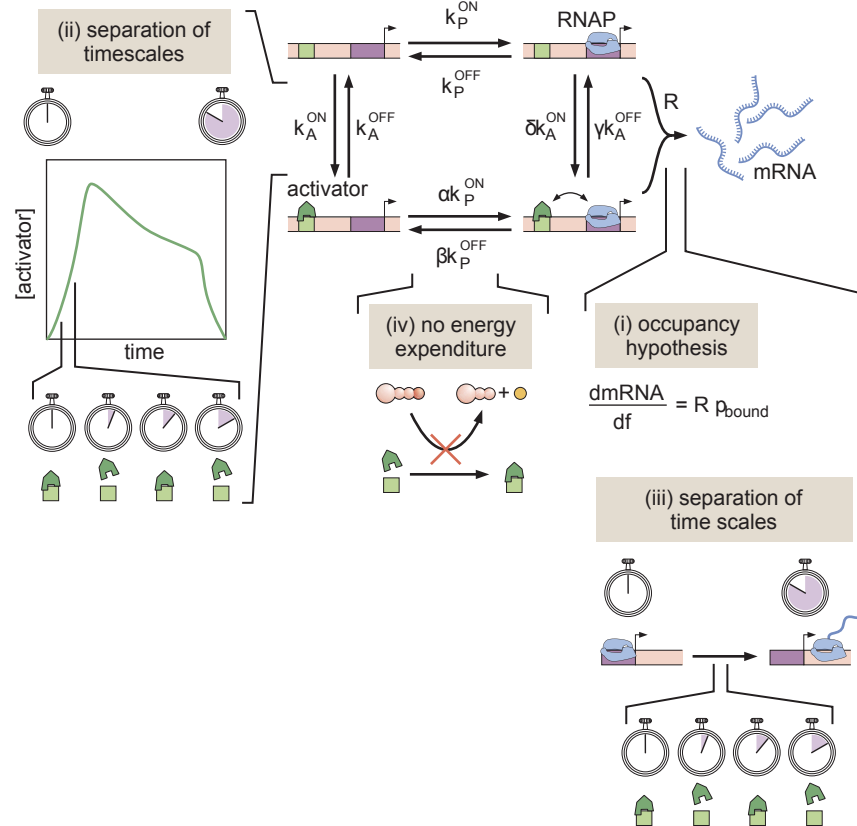

Figure S11: A simple kinetic model of transcriptional activation in which activator molecules influence RNAP binding kinetics. The assumptions that make it possible to turn this kinetic model into a thermodynamic one are (i) the occupancy hypothesis, (ii, iii) a separation of time scales between binding and unbinding rates, and activator and mRNA production dynamics, respectively, and (iv) no energy expenditure (detailed balance).

## S7. Non-equilibrium MWC model

### S7.1. Non-equilibrium MWC model

The non-equilibrium MWC model is an extension of the thermodynamic MWC model presented in Section S1.2, where we now relax the assumption of  
1550 separation of time scales (Fig. S11 ii and iii) and make it possible to assume, for example, that the system responds instantaneously to changes in activator concentration. Here, we explicitly simulate the full system of ordinary differential equations (ODEs) that describe the dynamics of the system out of steady state. Additionally, we allow for energy to be expended and thus do not enforce  
1555 detailed balance through the cycle condition (Fig. S11iv). We still employ a mitotic repression window term, before which no transcription is allowed.

We consider a generic model with  $n$  Bicoid binding sites, and again ignore Zelda since we are only interested in recapitulating the *zelda*<sup>-</sup> mutant data. As a result, this new model has  $n + 1$  total binding sites which, together with the  
1560 closed chromatin state, results in a total of  $2^{n+1} + 1 = N$  microstates. In the case of six Bicoid binding sites, this results in  $N = 129$  total microstates. We assign each microstate  $x_i$  a label  $i$  and describe the transition rate from state  $j$  to state  $i$  using  $k_{ij}$ , where  $i, j$  range from 0 to  $N - 1$ , inclusive.

In matrix notation, we write the system of ODEs as

$$\frac{d\vec{X}}{dt} = K\vec{X}, \quad (\text{S22})$$

where  $\vec{X}$  is a vector containing the fractional occupancy of each microstate  $x_i$   
1565 and  $K$  is a matrix containing all the transition rates  $k_{ij}$ . Normalizing such that the sum of all the components in the vector  $\vec{X}$  is unity, we now have a vector representing the instantaneous probability of being in each microstate.

To relate the occupancies of the different states to the rate of transcriptional initiation, we retain the occupancy hypothesis presented earlier: that  $p_{bound}$ , the  
1570 probability of being in a microstate with a bound RNAP molecule, is linearly related to the overall average transcriptional initiation rate that we determine from experimentally measurements.

For this particular system, it is helpful to define an intuitive microstate labeling system. Because the relevant physical processes are the binding and unbinding of Bicoid and RNAP molecules, we can represent any microstate in binary form, where the total number of digits is the total number of binding sites  $n + 1$ , and each digit represents an individual binding site. Our convention is to assign the first digit to the promoter, and the subsequent ones to the Bicoid sites. By assigning 0 to an unbound site and 1 to a bound site, we can rewrite each unique microstate's label  $i$  in binary form. For example, for a model with six Bicoid sites, the label for the microstate with no RNAP bound and the first two Bicoid sites occupied is represented with

$$i = \text{bin}(0110000) = 48. \quad (\text{S23})$$

Here,  $\text{bin}()$  indicates taking the base 2 value of the binary label in the parentheses. The closed chromatin state is added manually and assigned to the last position in our binary label,  $x_{N-1}$ . This convention allows us to intuitively define each unique label for the system's microstates and provides a way to map the physical contents of a microstate with its associated label  $i$ .

In general, the overall transition matrix  $K$  can be very complex. However, we benefit from the fact that the only non-zero transitions  $k_{ij}$  are the ones that correspond to physical processes: modifying the open/closed chromatin state, and binding and unbinding of Bicoid or RNAP molecules. In this binary notation, these constraints imply that the only nonzero transitions are the ones that represent individual flips between 0 and 1, as well as between the open and closed states 0 and  $N - 1$ . The transition matrix  $K$  is then easier to write, since it is clear from the binary representation which transitions must be nonzero. Finally, diagonal elements  $k_{ii}$  are entirely constrained because they represent probability loss from a particular state  $i$ , and must be equal to the negative of the rest of the column  $i$ , such that the sum over each column in  $K$  is zero.

Given that the Bicoid concentration changes as a function of time and that we assume first-order binding kinetics, whichever rates  $k_{ij}$  correspond to Bicoid binding rates must be multiplied by this time-dependent nuclear concentra-

tion. In contrast, all off-rates are independent of Bicoid concentration. To keep subsequent parameter exploration simple, we non-dimensionalized the Bicoid concentration by rescaling it by its approximate scale. This was achieved  
1595 by dividing all Bicoid concentrations by the average Bicoid concentration, calculated by averaging the mean Bicoid nuclear fluorescence across all datasets, anterior-posterior positions, and time points, yielding approximately 35 arbitrary fluorescence units. Thus, all of the transition rates  $k_{ij}$  in the model here are expressed in units of inverse minutes.

1600 To model transcription specifically, we assumed that at the beginning of the nuclear cycle, the system is in the closed chromatin state:  $x_i(t=0) = 0$  except for the closed chromatin state  $x_{N-1}(t=0) = 1$ . We simulated the full trajectory of all the microstates  $x_i$  over time by solving the system of ODEs given in Eq. S22. Finally, we calculated  $p_{bound}$  by summing the  $x_i$ 's that correspond  
1605 to RNAP-bound states, and then computed the subsequent transcriptional initiation rate by multiplying  $p_{bound}$  with the transcription rate  $R$ . Here,  $R$  is the same  $R_{max}$  as in Sections S1.2 and S6.1 but again we do not constrain the model using  $R_{min}$ , just as in Section S6.1.

Fig. S12A shows an example of this model for a system with only one Bicoid binding site and no closed chromatin state, for simplicity, resulting in a four-state network. The binary indexing labels (shown beneath each state in light pink) can be converted into the base-10 labels (light teal) ranging from 0 to 3. The connection matrix for this system is

$$C = \begin{bmatrix} 0 & 1 & 1 & 0 \\ 1 & 0 & 0 & 1 \\ 1 & 0 & 0 & 1 \\ 0 & 1 & 1 & 0 \end{bmatrix} \quad (\text{S24})$$

and the corresponding transition rate matrix  $K$  is

$$K = \begin{bmatrix} k_{00} & k_{01} & k_{02} & 0 \\ k_{10} & k_{11} & 0 & k_{13} \\ k_{20} & 0 & k_{22} & k_{23} \\ 0 & k_{31} & k_{32} & k_{33} \end{bmatrix}, \quad (\text{S25})$$

where, in this example,  $k_{02}$  represents the transition rate from state  $j$  to state  $i$ .

1610 The diagonal elements  $k_{ii}$  are equal to the negative of the sum of the elements in the rest of the column in order to preserve conservation of probability. For example,  $k_{00} = -(k_{10} + k_{20} + k_{30})$ .

With all this information in hand, we solve for the occupancy of each of the four states using the matrix ODE

$$\begin{bmatrix} \frac{dx_0}{dt} \\ \frac{dx_1}{dt} \\ \frac{dx_2}{dt} \\ \frac{dx_3}{dt} \end{bmatrix} = \begin{bmatrix} k_{00} & k_{01} & k_{02} & 0 \\ k_{10} & k_{11} & 0 & k_{13} \\ k_{20} & 0 & k_{22} & k_{23} \\ 0 & k_{31} & k_{32} & k_{33} \end{bmatrix} \begin{bmatrix} x_0 \\ x_1 \\ x_2 \\ x_3 \end{bmatrix}. \quad (\text{S26})$$

In this case, the occupancy hypothesis relates  $p_{bound}$  to the overall transcription rate, resulting in

$$\frac{dmRNA}{dt} = Rp_{bound} = R \frac{x_1 + x_3}{x_0 + x_1 + x_2 + x_3}. \quad (\text{S27})$$

This model can produce time-dependent behavior not found in the thermodynamic models. Fig. S12B contains an example of a hypothetical input Bicoid  
 1615 activator concentration that switches instantaneously from zero to a finite value. In the thermodynamic models, the predicted transcriptional initiation rate also responds instantaneously (Fig. S12B, top). In contrast, for a suitable set of parameters, the non-equilibrium MWC model predicts a slow response over time (Fig. S12B, bottom).

1620 To produce a simulated MS2 fluorescence trace, the resulting rate of mRNA production is integrated over time using the same procedure (Section S2.2) as the models presented in Sections S1.2, S6.1, and S8.1. As with the thermodynamic MWC model, we allow for a time window of mitotic repression to account for the lack of transcription early in the nuclear cycle.

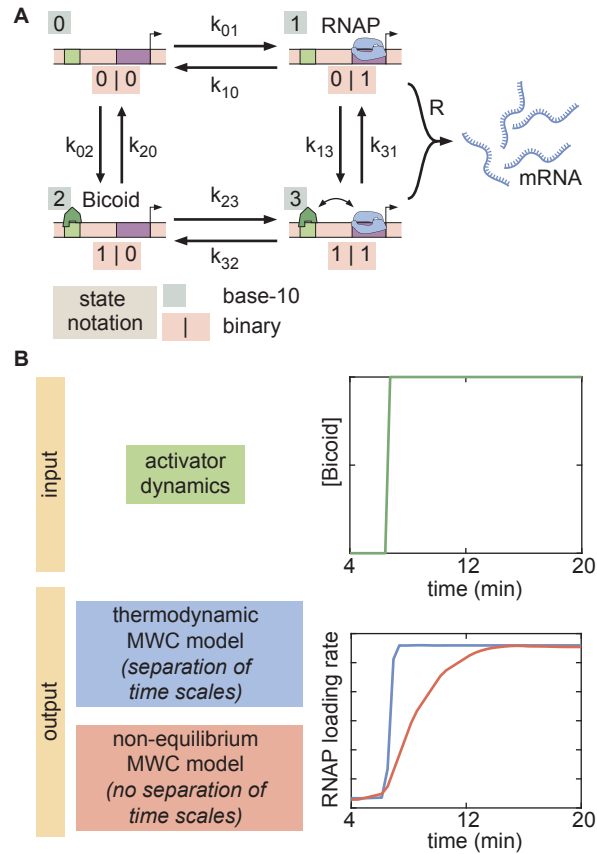

Figure S12: Example of a four-state time-dependent model with one Bicoid binding site and no closed chromatin state. (A) The binary label for each state (light pink) can be converted into a base-10 label for each state (light teal). The transition rates  $k_{ij}$  are defined as the transition rate from state  $i$  into state  $j$  using this labeling system. (B) For an example input activator concentration temporal profile that is a step function, the time-dependent response is compared for the cases of separation of time scales and lack thereof. In the former, the transcriptional initiation rate responds instantaneously to the increase in activator input, while the response is slower in the latter.

1625 *S7.2. Non-equilibrium MWC model state space exploration*

In the parameter exploration of this model (Section S5.1), the transition rates  $k_{ij}$  were constrained with minimum and maximum values of  $k_{min} = 1$  and  $k_{max} = 10^5$  respectively, in units of inverse minutes. These bounds were conservatively chosen using the following estimates. First, we estimate the values of the possible unbinding rates  $k_{off}$ . We assume that RNAP and Bicoid obey the same unbinding kinetics. Estimates of *in vivo* single-molecule binding kinetics inferred from Mir et al. (2018) indicate that the lifetime of Bicoid on DNA is on the order of  $3 s^{-1}$ . Second, we estimate the values of the possible on-rates  $k_{on}$  using the classic Berg-Purcell equation for the case of a diffusion-limited binding to a perfectly absorbing spherical receptor (Berg and Purcell, 1977). In this case, the on-rate of molecule binding is given by

$$k_{on} = 4\pi D a c_0, \quad (S28)$$

where  $D$  is the diffusion coefficient of the molecule,  $a$  is the estimated size of the spherical receptor, and  $c_0$  is the background concentration of the molecular species. Since here we are talking about transcription factor binding to a Bicoid binding site, we assume  $a$  to be on the order of 5 nm. We assume that RNAP and Bicoid obey the same diffusion characteristics, leading to a diffusion coefficient of approximately  $0.3 \mu m^2 s^{-1}$  (Gregor et al., 2007b). Finally, Bicoid is present at concentrations between 10 nM and 55 nM in the nucleus (Gregor et al., 2007a), and we assume that nuclear RNAP concentrations exist within the same range. Plugging these values into Eq. S28 yields estimates for the maximum and minimum on-rates:

$$\begin{aligned} k_{on}^{max} &\sim (4\pi)(0.3 \mu m^2 s^{-1})(1 \mu m)(55 nM) \\ &\sim 0.5 s^{-1} \sim 30 min^{-1}. \end{aligned}$$

and

$$\begin{aligned} k_{on}^{min} &\sim (4\pi)(0.3 \mu m^2 s^{-1})(1 \mu m)(10 nM) \\ &\sim 0.05 s^{-1} \sim 3 min^{-1}. \end{aligned}$$

Thus, our maximum and minimum transition rate bounds of  $k_{min} = 1 \text{ min}^{-1}$  and  $k_{max} = 10^5 \text{ min}^{-1}$  lie outside these estimated binding and unbinding rates.

One caveat of the state-space exploration approach is that the high dimensionality of the non-equilibrium MWC model prevented us from calculating the full state-space boundary using six Bicoid binding sites. Due to computational costs, we were only able to accurately produce a state-space boundary for this model (Section S7.1) using five Bicoid binding sites. Running the exploration for a model with six Bicoid binding sites took over two weeks on our own server, and the algorithm had not noticeably converged in the end.

The results of the state space exploration for the non-equilibrium MWC model using five Bicoid binding sites resulted in larger average  $t_{on}$  delays than the thermodynamic models (Sections S1.2 and S6.1). However, this model, like those, failed to reproduce the delays observed in *zelda*<sup>-</sup> data (Fig. S9B, gray bar).

## S8. Transcription factor-driven model of chromatin accessibility

### S8.1. Transcription factor-driven model of chromatin accessibility

The transcription factor-driven model of chromatin accessibility is a slight modification of the thermodynamic MWC model (Section S1.2) that replaces the MWC mechanism of chromatin transitions with a direct driving action due to Bicoid and Zelda. Here, we retain the idea of inaccessible vs. accessible states, but no longer demand that these states be in thermodynamic equilibrium. Instead, the system begins in the inaccessible state and undergoes a series of  $m$  identical, slow, and effectively irreversible transitions to the accessible state. Once these transitions into the accessible state occur, the system can rapidly and reversibly transition into all of its accessible microstates such that the probability of the system being in any of these microstates is described by thermodynamic equilibrium. The accessible states are governed by the same rules and parameters as the thermodynamic MWC model (Section S1.2), albeit



without the  $\Delta\varepsilon_{chrom}$  parameter since now the transition from the inaccessible  
1655 to accessible state is unidirectional.

Additionally, we consider two possible contributions for these irreversible transitions: a Bicoid-dependent pathway and a Zelda-dependent pathway. We assume the transition rates to be first-order in Bicoid and Zelda, respectively, such that

$$\pi_b = c_b[Bicoid] \quad (S29)$$

and

$$\pi_z = c_z[Zelda]. \quad (S30)$$

Here,  $\pi_b$  is the Bicoid-dependent contribution to the transition rates and  $\pi_z$  is the corresponding Zelda-dependent contribution. There are two input parameters  $c_b$  and  $c_z$  that give the relative speed of each transition rate contribution. The overall rate  $\pi$  of each irreversible transition is given by the sum

$$\pi = \pi_b + \pi_z = c_b[Bicoid] + c_z[Zelda]. \quad (S31)$$

Because the accessible states are in thermodynamic equilibrium with each other, we can effectively treat them as a single state and describe the entire system with  $m + 1$  states, corresponding to the inaccessible, intermediate, and accessible states. We label the inaccessible state with 0, the  $m - 1$  intermediate states with 1 through  $m - 1$ , and the final accessible state with  $m$ . Thus, we describe the probability  $p_i$  of the system being in the state  $i$  with the probability vector  $\vec{P}$

$$\vec{P} = \begin{bmatrix} p_0 \\ p_1 \\ \dots \\ p_m \end{bmatrix}. \quad (S32)$$

Calculating the overall RNAP loading rate then simply corresponds to rescaling  $p_{bound}$  with the overall probability  $p_m(t)$  of being in the accessible state:

$$\frac{dmRNA}{dt} = R p_{bound} p_m, \quad (S33)$$

where  $R$  is the same maximum rate used in Section S1.2. Note that  $p_m(t)$  is a time-dependent quantity that changes over time. To calculate  $p_m(t)$ , we solve the corresponding system of ODEs that describes the time evolution of  $\vec{P}$

$$\frac{d\vec{P}}{dt} = \Pi\vec{P}, \quad (\text{S34})$$

where  $\Pi$  is the transition rate matrix describing the time evolution of the system.  $\Pi$ , by definition, is a square matrix with dimension  $m + 1$ . Given the initial condition that the system begins in the inaccessible state

$$\vec{P} = \begin{bmatrix} 1 \\ 0 \\ \dots \\ 0 \end{bmatrix} \quad (\text{S35})$$

the system of ODEs can be solved to find the probability of being in the accessible state  $p_m(t)$ . For example, for  $m = 3$  irreversible steps,  $\Pi$  takes the form

$$\Pi = \begin{bmatrix} -\pi & 0 & 0 & 0 \\ \pi & -\pi & 0 & 0 \\ 0 & \pi & -\pi & 0 \\ 0 & 0 & \pi & 0 \end{bmatrix}, \quad (\text{S36})$$

where  $\pi$  is given by Eq. S31.

For simplicity, the time evolution of  $\vec{P}$  was solved using MATLAB's `ode15s` solver.

With the probability  $p_m(t)$  of the system being in the accessible state calculated, we now calculate the probability  $p_{bound}$  of RNAP bound to the promoter in the accessible states, which lie in thermodynamic equilibrium with each other. Because we now only have accessible states, the partition function is

$$Z = (1 + z)^{10} \left( 1 + p + \sum_{j=0,1} \sum_{i=1}^6 \binom{6}{i} b^i \omega_b^{i-1} p^j \omega_{bp}^{ij} \right), \quad (\text{S37})$$

where  $z$ ,  $p$ , and  $b$  correspond to the non-dimensionalized concentrations of Zelda, RNAP, and Bicoid, respectively, and  $\omega_b$  and  $\omega_{bp}$  are the cooperativities between

Bicoid molecules and between Bicoid and RNAP, respectively. Thus, the overall transcriptional initiation rate is given by

$$\begin{aligned} \text{Rate} &= \frac{R}{Z} \left( (1+z)^{10} p \left( 1 + \sum_{i=1}^6 \binom{6}{i} b^i \omega_b^{i-1} \omega_{bp}^i \right) \right) p_m \quad (\text{S38}) \\ &= R \frac{\left( p \left( 1 + \sum_{i=1}^6 \binom{6}{i} b^i \omega_b^{i-1} \omega_{bp}^i \right) \right)}{\left( 1 + p + \sum_{j=0,1} \sum_{i=1}^6 \binom{6}{i} b^i \omega_b^{i-1} p^j \omega_{bp}^{ij} \right)} p_m. \end{aligned}$$

Due to the lack of the inaccessible state in the partition function and because  
 1660 we assume that Zelda does not directly interact with Bicoid or RNAP, now the presence of Zelda mathematically separates out so that only Bicoid influences transcription. The calculation above is a standard equilibrium statistical mechanical calculation, except that we have weighted the final result with  $p_m(t)$ , the probability of being in the accessible states. The resulting rate is inte-  
 1665 grated to produce a simulated MS2 fluorescence trace using the same procedure (Section S2.2) as the models presented in Sections S1.2, S6.1, and S7.1.

Interestingly, we found that a mitotic repression term was not necessary to recapitulate the data, since the presence of intermediary states produced the necessary delay to explain the experimentally observed  $t_{on}$  values in the data  
 1670 (Fig. 4D and G, points).

In order to sufficiently explain the data, we found that a minimum of  $m = 5$  irreversible steps was necessary. Fig. S13A and B show the results of fitting this model to the observed rates of RNAP loading and  $t_{on}$  for the wild-type and *zelda*<sup>-</sup> data, for increasing values of  $m$  (wild-type results not shown, since all  
 1675 values of  $m$  easily explained the wild-type data). We see that while lower values of  $m$  do a poor job of recapitulating the data, once we reach  $m = 5$  the model sufficiently predicts the experimental data within experimental error. For values of  $m$  higher than 5, explanatory power increases marginally. Considering the parameter exploration of this model (Section S8.2) highlights the necessity of  
 1680 having at least  $m = 5$  steps.

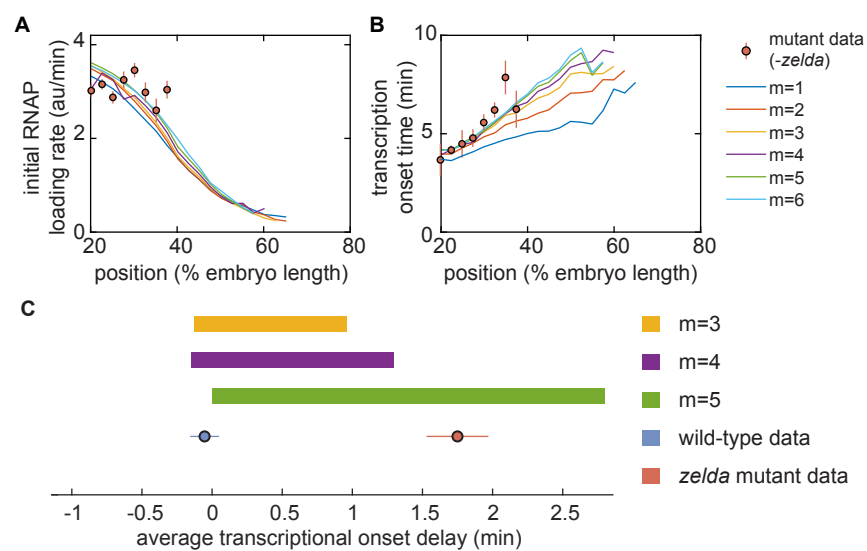

Figure S13: Testing the transcription factor-driven model of chromatin accessibility. (A,B) Best-fit results of the non-equilibrium MWC model to the mutant *zelda*<sup>-</sup> data. (A) initial RNAP loading rates, and (B)  $t_{on}$ , for varying numbers  $m$  of irreversible steps. (C) Parameter exploration in average  $t_{on}$  delay space for increasing values of  $m$ .

### S8.2. Transcription factor-driven model of chromatin accessibility state space exploration

In the parameter exploration of this model (Section S5.1), the parameters were constrained as

- 1685 •  $c_b > 0$
- $c_z > 0$ .

The parameters shared with the thermodynamic MWC model retained the constraints described in Section S1.3.

Fig. S13C shows the parameter space explorations (see Section S5.1) of this transcription factor-driven model for increasing numbers of intermediate steps  $m$ . Not until  $m = 5$  does the model explain the average  $t_{on}$  delay for both the wild-type and *zelda*<sup>-</sup> data, indicating that  $m = 5$  is the minimum number of irreversible steps necessary. In the state space exploration shown in Fig. S9, the number of irreversible steps was fixed at  $m = 5$ .

1695 Unlike the other models investigated (Sections S1.2, S6.1, and S7.1), the transcription factor-driven model of chromatin accessibility occupied a region in state space that encompassed both the wild-type and *zelda*<sup>-</sup> data (Fig. S9, brown rectangle).

## S9. Supplementary Videos

1700 S1. **Video 1. Measurement of eGFP-Bicoid.** Movie of eGFP-Bicoid fusion in an embryo in nuclear cycle 13. Time is defined with respect to the previous anaphase.

S2. **Video 2. Measurement of Zelda-sfGFP.** Movie of Zelda-sfGFP fusion in an embryo in nuclear cycle 13. Time is defined with respect to the previous anaphase.

1705 S3. **Video 3. Measurement of MS2 fluorescence in a wild-type background.** Movie of MS2 fluorescent spots in a wild-type background embryo in nuclear cycle 13. Time is defined with respect to the previous anaphase.

- 1710 S4. **Video 4. Measurement of MS2 fluorescence in a *zelda*<sup>-</sup> background.** Movie of MS2 fluorescent spots in a *zelda*<sup>-</sup> background embryo in nuclear cycle 13. Time is defined with respect to the previous anaphase.
- 1715 S5. **Video 5. Transcriptionally active nuclei in a wild-type background.** Movie of MS2 fluorescent spots in a wild-type background embryo in nuclear cycle 13, with transcriptionally active nuclei labeled with an overlay. Time is defined with respect to the previous anaphase.
- S6. **Video 6. Transcriptionally active nuclei in a *zelda*<sup>-</sup> background.** Movie of MS2 fluorescent spots in a *zelda*<sup>-</sup> background embryo in nuclear cycle 13, with transcriptionally active nuclei labeled with an overlay. Time is defined with respect to the previous anaphase.
